# Supplementary material for: Metal-free trifunctionalization of phenylacetylenes: an efficient one-pot two-step synthesis ofgem-bis(dithiocarbamates)
Source: Royal Society of Chemistry journal article supplement (doi:10.1039/d3ob00712j), 2023-01-01
Supplement: d3ob00712j1.pdf [file d3ob00712j1.pdf]

## Supporting Information

### **Metal-free trifunctionalization of phenylacetylenes: An efficient one-pot two-step synthesis of *gem*-bis(dithiocarbamates)**

Manas Mondal,<sup>a</sup> Debajyoti Saha,<sup>b,\*</sup> and Amit Saha<sup>a,\*</sup>

<sup>a</sup>Department of Chemistry, Jadavpur University, Kolkata 700032, India

<sup>b</sup>Department of Chemistry, Krishnagar Govt. College, Krishnagar, West Bengal, India

## List of Contents

|                                                                     |       |
|---------------------------------------------------------------------|-------|
| A. General Information.....                                         | 2     |
| B. General Experimental Procedure.....                              | 2     |
| C. Experimental Procedure of Gram-scale Experiment.....             | 3     |
| D. Experimental Procedure of Post Functionalization.....            | 3     |
| E. Characterization Data of Synthesized Compounds.....              | 4-8   |
| F. <sup>1</sup> H and <sup>13</sup> C Spectra of All Compounds..... | 9-28  |
| G. <sup>19</sup> F NMR spectra of fluorinated products.....         | 29-30 |
| H. HRMS Spectra of Some Compounds.....                              | 31-36 |
| I. X-ray Crystallography Data.....                                  | 37-38 |
| J. Gas chromatogram.....                                            | 39-42 |
| J. Reference.....                                                   | 43    |

## **A. General Information:**

All chemicals were purchased and used without further purification. Analytical thin-layer chromatography (TLC) was performed on silica gel plates (Merck silica gel,  $f_{24}$ ). In column-chromatographic purification process, silica gel 60-120 mesh has been used. The  $^1\text{H}$  spectra of synthesized products were recorded in  $\text{CDCl}_3$  on Bruker Spectrometer at 300, 400 MHz. The  $^{19}\text{F}$  spectra of synthesized fluorinated products were recorded in  $\text{CDCl}_3$  on Bruker Spectrometer, 300 MHz. The  $^{13}\text{C}$  spectra of synthesized products were recorded in  $\text{CDCl}_3$  on Bruker Spectrometer at 75, 100 MHz. In all NMR experiments,  $\text{CDCl}_3$  were used as solvent and TMS as internal standard. Chemical shifts were reported in ppm referenced to 0.00 ppm for TMS. HRMS were measured in methanol solvent on a Waters Micromass Q-tof Micromass spectrometer.

## **B. General experimental procedure:**

### **Preparation of dithiocarbamates salts:**

$\text{CS}_2$  (0.2 mL, 3 mmol) was added dropwise to a solution of secondary amine (2 mmol) and  $\text{Et}_3\text{N}$  (0.28 mL, 2 mmol) in acetonitrile (2 mL) at 5 °C. The resulting solution was stirred at room temperature for 5 min.

### **Preparation of *gem*-bis(dithiocarbamates):**

$\text{Br}_2$  (0.05 mL, 1 mmol) in MeCN (1 mL) was added dropwise to the solution of aromatic acetylene (1 mmol) in MeCN (2 mL) containing 0.04 mL of water at 5 °C. After complete addition, the reaction mixture was allowed to stir for 30 min at room temperature. Then the freshly prepared dithiocarbamate salt (2 mmol) was added to the reaction mixture and was stirred at 65 °C for a certain reaction time period. After completion of the reaction (checked by TLC), the solvent was evaporated under reduced pressure. The crude product was extracted with ethyl acetate and purified by column chromatography to obtain the desired product.

### C. Gram-scale Experiment (9.8 mmol scale)

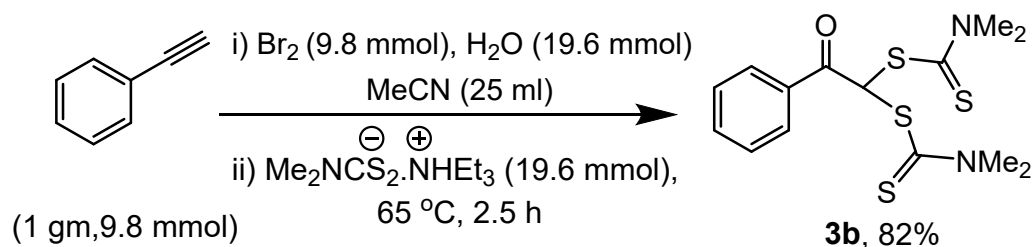

Br<sub>2</sub> (0.49 mL, 9.8 mmol) in MeCN (5 mL) was added dropwise to the solution of phenylacetylene (1.08 mL, 9.8 mmol) in MeCN (10 mL) containing 0.4 mL of water at 5 °C. After complete addition, the reaction mixture was allowed to stir for 30 min at room temperature. Then the freshly prepared dithiocarbamate salt (Me<sub>2</sub>NCS<sub>2</sub>·NHEt<sub>3</sub>, 19.6 mmol) was added to the reaction mixture and was stirred at 65 °C for 2 h. After completion of the reaction (checked by TLC), the solvent was evaporated under reduced pressure. The crude product was extracted with ethyl acetate and purified by column chromatography to obtain the desired product.

### D. Post functionalization

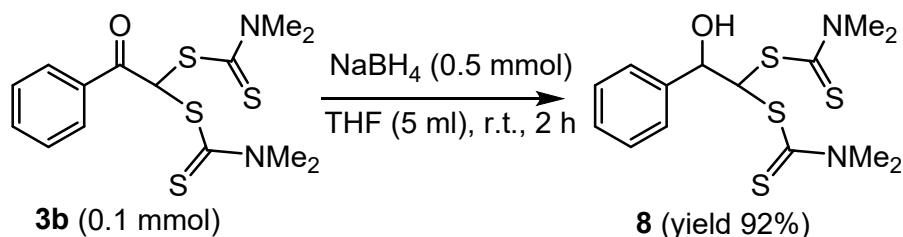

To a solution of compound **3b** (35.8 mg, 0.1 mmol) in THF (5 mL) at 0 °C, was added THF solution of NaBH<sub>4</sub> (19 mg, 0.5 mmol) for a period of 30 min duration. Then the reaction mixture was stirred at room temperature for 2 h. It was quenched with saturated NH<sub>4</sub>Cl aqueous solution and the aqueous phase was extracted three times with ethyl acetate. The combined organic phase was dried over sodium sulphate. Then, the crude compound was purified by column chromatography to obtain the desired product.

## E. Characterization Data of Synthesized Compounds:

1. 2-oxo-2-phenylethane-1,1-diylbis(diethylcarbamodithioate) (**3a**)<sup>1</sup>: White solid, <sup>1</sup>H NMR(400 MHz, CDCl<sub>3</sub>) δ: 1.25-1.32(m, 12H), 3.66-3.74(m, 4H), 3.90-4.02(m, 4H), 7.43-7.49(m, 2H), 7.52-7.57(m, 1H), 7.78(s, 1H), 8.16-8.20(m, 2H), <sup>13</sup>C NMR (100MHz,CDCl<sub>3</sub>) δ: 10.52, 11.74, 46.25, 48.96, 60.92, 127.50 (2C), 128.24 (2C), 132.08, 134.37, 189.98, 190.76 (2C).

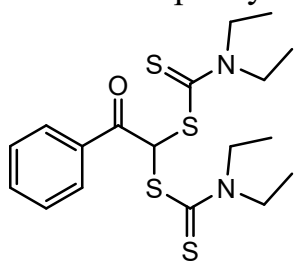

2. 2-oxo-2-phenylethane-1,1-diylbis(dimethylcarbamodithioate) (**3b**): Yellow solid, <sup>1</sup>H NMR (400 MHz, CDCl<sub>3</sub>) δ: 3.35 (s, 6H), 3.50 (s, 6H), 7.43-7.49 (m, 2H), 7.53-7.59(m, 1H) 7.73 (s, 1H), 8.14-8.17 (m, 2H), <sup>13</sup>C NMR (100MHz, CDCl<sub>3</sub>) δ: 41.72, 45.77, 62.90, 128.63(2C), 129.22(2C), 133.34, 135.14, 190.51, 193.04, HRMS (ESI) m/z calcd for C<sub>14</sub>H<sub>18</sub>N<sub>2</sub>OS<sub>4</sub> [M + H]<sup>+</sup>, 358.0302, found 359.0526.

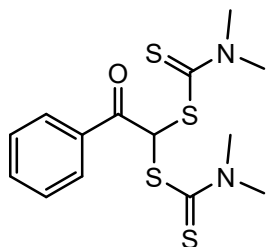

3. 2-oxo-2-phenylethane-1,1-diylbis(morpholine-4-carbamodithioate) (**3c**): White solid, <sup>1</sup>H NMR (400 MHz, CDCl<sub>3</sub>) δ: 3.75(s, 8H), 3.88 (broad, 4H), 4.25 (broad, 4H), 7.45-7.51 (m, 2H), 7.59-7.61(m, 1H), 7.89 (s, 1H), 8.14-8.17 (m, 2H), <sup>13</sup>C NMR (100 MHz,CDCl<sub>3</sub>) δ: 50.80, 51.71, 61.55, 66.13(2C), 128.73(2C), 129.23(2C), 133.55, 134.91, 190.45, 193.16(2C). HRMS (ESI) m/z calcd for C<sub>18</sub>H<sub>22</sub>N<sub>2</sub>O<sub>3</sub>S<sub>4</sub> [M + H]<sup>+</sup>, 442.0513, found 443.0593.

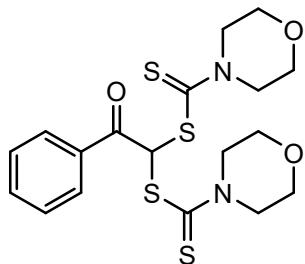

4. 2-oxo-2-phenylethane-1,1-diylbis(piperidine-1-carbamodithioate) (**3d**): Light yellow solid, <sup>1</sup>H NMR (400 MHz, CDCl<sub>3</sub>) δ: 1.69(s, 12H), 3.84(broad, 4H), 4.19-4.23(broad, 4H), 7.45-7.49(m, 2H), 7.54-7.59(m, 1H), 7.88(s, 1H), 8.18-8.20(m, 2H), <sup>13</sup>C NMR (100 MHz, CDCl<sub>3</sub>) δ: 24.05, 25.32, 26.07, 51.89, 53.38, 61.85, 128.58(2C), 129.27(2C), 133.22, 135.24, 190.97, 191.57(2C), HRMS (ESI) m/z calcd for C<sub>20</sub>H<sub>26</sub>N<sub>2</sub>OS<sub>4</sub> [M + H]<sup>+</sup>, 438.0928, found 439.0497.

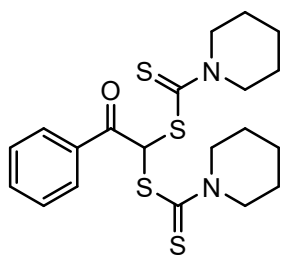

5. 2-oxo-2-phenylethane-1,1-diylbis(methyl(phenyl)carbamodithioate) (**3e**): Light

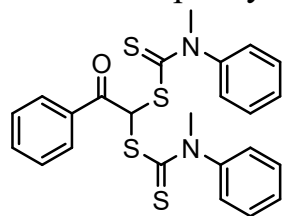

yellow solid,  $^1\text{H NMR}$ (400 MHz,  $\text{CDCl}_3$ )  $\delta$ : 3.71(s, 6H), 7.20-7.22(m, 4H), 7.37-7.48(m, 8H), 7.54-7.60(m, 2H), 8.11-8.13(m, 2H),  $^{13}\text{C NMR}$ (100 MHz,  $\text{CDCl}_3$ )  $\delta$ : 46.53, 63.27, 126.91, 128.54, 129.14, 129.28, 129.87, 133.16, 135.35, 143.96, 190.96, 195.36(2C), HRMS (ESI)  $m/z$  calcd for  $\text{C}_{24}\text{H}_{22}\text{N}_2\text{OS}_4$   $[\text{M} + \text{H}]^+$ , 482.061, found 483.108.

6. 2-oxo-2-phenylethane-1,1-diylbis(pyrrolidine-1-carbamodithioate) (**3f**): White

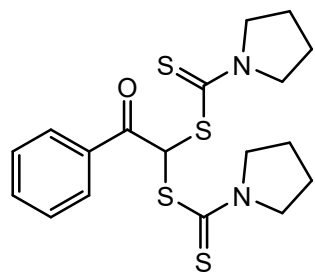

solid,  $^1\text{HNMR}$  (300 MHz,  $\text{CDCl}_3$ )  $\delta$ : 1.95-2.10(m, 8H), 3.64(t,  $J=6.9$  Hz, 4H), 3.87(t,  $J=6.9$  Hz, 4H), 7.43-7.58(m, 3H), 7.83(s, 1H), 8.17-8.20(m, 2H),  $^{13}\text{C NMR}$  (75 MHz,  $\text{CDCl}_3$ )  $\delta$ : 24.30, 26.12, 50.73, 51.43, 60.87, 128.60(2C), 129.30(2C), 133.30, 135.12, 186.60, 190.97(2C), HRMS (ESI)  $m/z$  calcd for  $\text{C}_{18}\text{H}_{22}\text{N}_2\text{OS}_4$   $[\text{M} + \text{H}]^+$ , 410.0615, found 411.0692.

7. 2-(4-methoxyphenyl)-2-oxoethane-1,1-diyl bis(diethylcarbamodithioate) (**3g**):

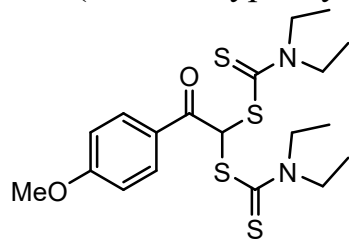

Light yellow solid,  $^1\text{HNMR}$  (300 MHz,  $\text{CDCl}_3$ )  $\delta$ : 1.22-1.31(m, 12H), 3.67-3.74(m, 4H), 3.86(s, 3H), 3.92-4.01(m, 4H), 6.94(d,  $J=8.7$  Hz, 2H), 7.74(s, 1H), 8.18(d,  $J=9$  Hz, 2H),  $^{13}\text{C NMR}$  (75 MHz,  $\text{CDCl}_3$ )  $\delta$ : 10.51, 11.72, 46.17, 54.44, 60.67, 112.79(2C), 127.19, 130.63(2C), 162.64, 188.70, 190.81(2C), HRMS (ESI)  $m/z$  calcd for  $\text{C}_{19}\text{H}_{28}\text{N}_2\text{O}_2\text{S}_4$   $[\text{M} + \text{Na}]^+$ , 467.0931, found 467.0988.

8. 2-(4-methoxyphenyl)-2-oxoethane-1,1-diyl bis(dimethylcarbamodithioate) (**3h**):

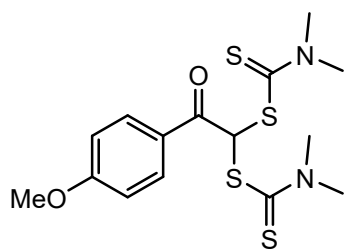

Light yellow solid,  $^1\text{H NMR}$  (300MHz,  $\text{CDCl}_3$ )  $\delta$ : 3.35(s, 6H), 3.50(s, 3H), 3.86(s, 3H), 6.94(d,  $J=9$  Hz, 2H), 7.69(s, 1H), 8.16(d,  $J=9$  Hz, 2H),  $^{13}\text{C NMR}$  (75MHz,  $\text{CDCl}_3$ )  $\delta$ : 41.67, 45.71, 55.49, 62.73, 113.89(2C), 128.08, 131.62(2C), 189.42, 193.22(2C), HRMS (ESI)  $m/z$  calcd for  $\text{C}_{15}\text{H}_{20}\text{N}_2\text{O}_2\text{S}_4$   $[\text{M}]^+$ , 388.04, found 388.21.

9. 2-(4-methoxyphenyl)-2-oxoethane-1,1-diyl bis(piperidine-1-carbamodithioate)

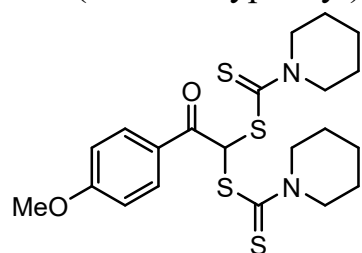

(**3i**): White solid,  $^1\text{H NMR}$  (400 MHz,  $\text{CDCl}_3$ )  $\delta$ : 1.67(s, 12H), 3.82(broad, 4H), 3.86(s, 3H), 4.19(broad, 4H), 6.94(d,  $J=9.2$  Hz, 2H), 7.81(s, 1H), 8.18(d,  $J=8.8$  Hz,

2H),  $^{13}\text{C}$  NMR (75 MHz,  $\text{CDCl}_3$ )  $\delta$ :  $^{13}\text{C}$  NMR (75 MHz,  $\text{CDCl}_3$ )  $\delta$ : 24.08, 25.31, 26.05, 51.81, 53.81, 55.51, 61.73, 113.85(2C), 128.16, 131.67(2C), 163.70, 189.64, 191.76(2C), HRMS (ESI)  $m/z$  calcd for  $\text{C}_{21}\text{H}_{28}\text{N}_2\text{O}_2\text{S}_4$   $[\text{M} + \text{Na}]^+$ , 491.0931, found 491.0933.

**10.** 2-(3-fluorophenyl)-2-oxoethane-1,1-diyl bis(morpholine-4-carbamodithioate)

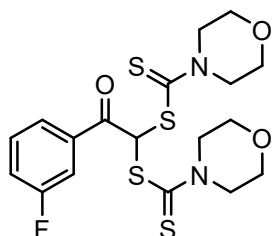

**(3j):** White solid,  $^1\text{H}$  NMR (300 MHz,  $\text{CDCl}_3$ )  $\delta$ : 3.75(s, 8H), 3.88(broad, 4H), 4.25(broad, 4H), 7.24-7.31(m, 1H), 7.42-7.49(m, 1H), 7.80-7.84(m, 2H), 7.95-7.97(m, 2H),  $^{13}\text{C}$  NMR (75 MHz,  $\text{CDCl}_3$ )  $\delta$ : 50.94, 51.76, 61.46, 66.17(2C), 115.92( $J=22.8$  Hz), 120.52( $J=21.37$  Hz), 124.93( $J=3.07$  Hz), 130.36( $J=7.42$  Hz), 137.05( $J=6.6$  Hz), 162.78( $J=246$  Hz), 189.41( $J=2.17$  Hz), 192.93(2C), HRMS (ESI)  $m/z$  calcd for  $\text{C}_{18}\text{H}_{21}\text{FN}_2\text{O}_3\text{S}_4$   $[\text{M} + \text{H}]^+$ , 460.0419, found 461.0156.

**11.** 2-(3-fluorophenyl)-2-oxoethane-1,1-diyl bis(pyrrolidine-1-carbamodithioate)

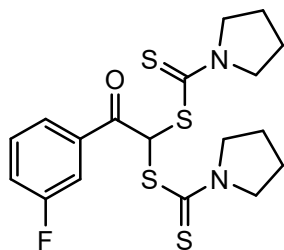

**(3k):** Light yellow solid,  $^1\text{H}$  NMR (300 MHz,  $\text{CDCl}_3$ )  $\delta$ : 1.95-2.15(m, 8H), 3.67(t,  $J=6.9$  Hz, 4H), 3.91(t,  $J=6.9$  Hz, 4H), 7.28-7.31(m, 1H), 7.44-7.51(m, 1H), 7.81(s, 1H), 7.87-7.90(m, 1H), 8.03-8.05(m, 1H),  $^{13}\text{C}$  NMR (75 MHz,  $\text{CDCl}_3$ )  $\delta$ : 24.30, 26.23, 50.78, 55.50, 60.80, 115.93( $J=23.25$  Hz), 120.27( $J=21$  Hz), 125.03( $J=3$  Hz), 130.25( $J=7.5$  Hz), 137.27( $J=6.75$  Hz), 162.75( $J=246$  Hz), 188.33(2C), 189.91( $J=2.25$  Hz), HRMS (ESI)  $m/z$  calcd for  $\text{C}_{18}\text{H}_{21}\text{FN}_2\text{OS}_4$   $[\text{M} + \text{H}]^+$ , 428.0521, found 429.0115.

**12.** 2-(3-fluorophenyl)-2-oxoethane-1,1-diyl bis(piperidine-1-carbamodithioate)

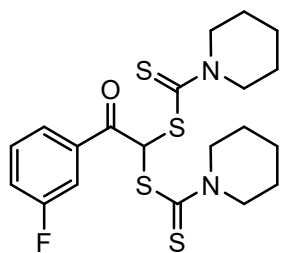

**(3l):** Light yellow solid,  $^1\text{H}$  NMR (300 MHz,  $\text{CDCl}_3$ )  $\delta$ : 1.72(s, 12H), 3.86(broad, 4H), 4.23(broad, 4H), 7.28-7.31(m, 1H), 7.44-7.51(m, 2H), 7.86-7.91(m, 2H), 8.02-8.05(m, 1H).  $^{13}\text{C}$  NMR (75 MHz,  $\text{CDCl}_3$ )  $\delta$ : 24.04, 25.32, 26.07, 51.93, 53.46, 61.78, 115.93( $J=22.5$  Hz), 120.16( $J=21$  Hz), 125.01( $J=3$  Hz), 130.20( $J=8.25$  Hz), 137.41( $J=6.75$  Hz), 162.76( $J=246$  Hz), 189.91( $J=2.25$  Hz), 191.35(2C), HRMS (ESI)  $m/z$  calcd for  $\text{C}_{20}\text{H}_{25}\text{FN}_2\text{OS}_4$   $[\text{M} + \text{H}]^+$ , 456.0834, found 457.0468.

**13.** 2-(4-bromophenyl)-2-oxoethane-1,1-diyl bis(pyrrolidine-1-carbamodithioate)

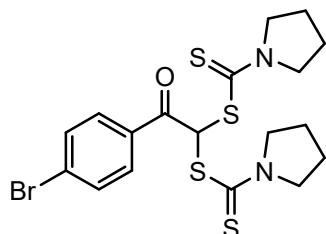

**(3m):** White solid,  $^1\text{H}$  NMR (400 MHz,  $\text{CDCl}_3$ )  $\delta$ : 1.93-2.00(m, 4H), 2.04-2.11(m, 4H), 3.64(t,  $J=6.8$  Hz, 4H), 3.88(t,  $J=7.2$  Hz, 4H), 7.59-7.62(m, 2H), 7.79(s, 1H), 8.05-

8.08(m, 2H),  $^{13}\text{C}$  NMR (75 MHz,  $\text{CDCl}_3$ )  $\delta$ : 24.30, 26.22, 50.77, 55.51, 60.67, 128.46, 130.82(2C), 131.92(2C), 133.96, 188.40, 190.19(2C), HRMS (ESI)  $m/z$  calcd for  $\text{C}_{18}\text{H}_{21}\text{BrN}_2\text{OS}_4$   $[\text{M} + \text{H}]^+$ , 489.5361, found 490.9411.

**14. 2-(4-bromophenyl)-2-oxoethane-1,1-diyl bis(morpholine-4-carbamodithioate)**

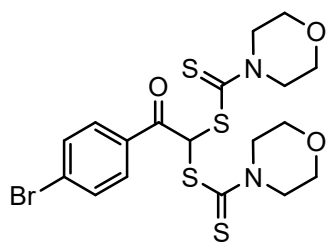

**(3n):** White solid,  $^1\text{H}$  NMR (300 MHz,  $\text{CDCl}_3$ )  $\delta$ : 3.74(s, 8H), 3.88(broad, 4H), 4.24(broad, 4H), 7.61(d,  $J=8.4$  Hz, 2H), 7.85(s, 1H), 8.02(d,  $J=8.7$  Hz, 2H),  $^{13}\text{C}$  NMR (75 MHz,  $\text{CDCl}_3$ )  $\delta$ : 50.85, 51.74, 61.30, 66.17(2C), 128.75, 130.73(2C), 132.05(2C), 133.73, 189.66, 192.94(2C). HRMS (ESI)  $m/z$  calcd for  $\text{C}_{18}\text{H}_{21}\text{BrN}_2\text{O}_3\text{S}_4$   $[\text{M} + \text{H}]^+$ , 519.9618, found 520.9148.

**15. 2-(4-bromophenyl)-2-oxoethane-1,1-diyl bis(piperidine-1-carbamodithioate)**

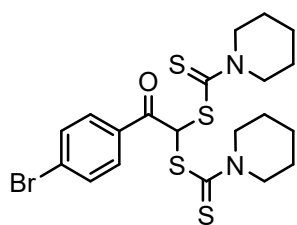

**(3o):** Light yellow solid,  $^1\text{H}$  NMR (300 MHz,  $\text{CDCl}_3$ )  $\delta$ : 1.50(s, 12H), 3.76(broad, 4H), 4.13(broad, 4H), 7.52-7.55(m, 2H), 7.76(s, 1H), 7.98-8.00(m, 2H),  $^{13}\text{C}$  NMR (75 MHz,  $\text{CDCl}_3$ )  $\delta$ : 24.02, 25.30, 26.04, 51.90, 53.45, 61.67, 128.32, 130.81(2C), 131.88(2C), 134.14, 190.13, 191.44(2C), HRMS(ESI)  $m/z$  calcd for  $\text{C}_{20}\text{H}_{25}\text{BrN}_2\text{OS}_4$   $[\text{M} + \text{H}]^+$ , 516.0033, found 517.0233.

**16. 2-oxo-2-(p-tolyl)ethane-1,1-diyl bis(methyl(phenyl)carbamodithioate) (3p):**

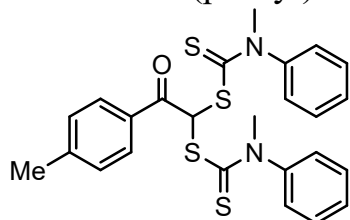

White solid,  $^1\text{H}$ NMR (400 MHz,  $\text{CDCl}_3$ )  $\delta$ : 2.41(s, 3H), 3.70(s, 6H), 7.20-7.27(m, 6H), 7.37-7.41(m, 6H), 7.56(s, 1H), 8.01-8.03(m, 2H),  $^{13}\text{C}$  NMR (100 MHz,  $\text{CDCl}_3$ )  $\delta$ : 21.79, 46.48, 63.24, 126.93, 129.28, 129.85, 132.81, 144.03, 190.61, 195.45(2C). ), HRMS (ESI)  $m/z$  calcd for  $\text{C}_{25}\text{H}_{24}\text{N}_2\text{OS}_4$   $[\text{M} + \text{H}]^+$ , 496.077, found 497.0989.

**17. 2-oxo-2-(p-tolyl)ethane-1,1-diyl bis(piperidine-1-carbamodithioate) (3q):**

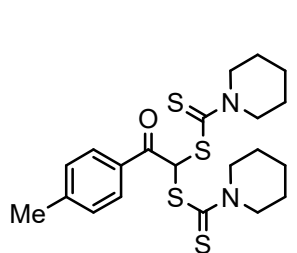

White solid,  $^1\text{H}$  NMR (300 MHz,  $\text{CDCl}_3$ )  $\delta$  : 1.69(s, 12H), 2.41(s, 3H), 3.83(broad, 4H), 4.20(broad, 4H), 7.28(broad, 1H), 7.84(s, 1H) , 8.09(d,  $J=8.1$  Hz, 2H),  $^{13}\text{C}$  NMR(75 MHz,  $\text{CDCl}_3$ )  $\delta$ : 21.78, 24.07, 25.32, 26.04, 51.84, 53.31, 61.82, 129.33(2C), 129.44(2C), 132.68, 144.09, 190.63, 191.74(2C), HRMS(ESI)  $m/z$  calcd for  $\text{C}_{21}\text{H}_{28}\text{N}_2\text{OS}_4$   $[\text{M} + \text{H}]^+$ , 452.108, found 453.629.

**18. 2-(4-cyanophenyl)-2-oxoethane-1,1-diylbis(dimethylcarbamoedithioate) (3r):**

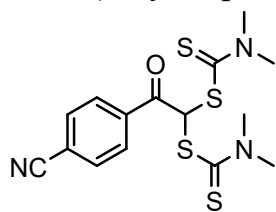

White solid,  $^1\text{H}$  NMR (400 MHz,  $\text{CDCl}_3$ )  $\delta$  : 3.36(s, 6H), 3.51(s, 6H), 7.75-7.77(m, 3H), 8.23-8.26(m, 2H),  $^{13}\text{C}$  NMR(100 MHz,  $\text{CDCl}_3$ )  $\delta$ : 40.78, 44.92, 61.62, 115.19, 117.14, 128.79(2C), 131.44(2C), 137.50, 188.51, 191.52, HRMS (ESI)  $m/z$  calcd for  $\text{C}_{15}\text{H}_{17}\text{N}_3\text{NaOS}_4$   $[\text{M} + \text{Na}]^+$ , 406.0152,

found 406.0144.

**19. 2,2-dibromo-1-phenylethan-1-one (4):** Yellow liquid,  $^1\text{H}$  NMR (300 MHz,  $\text{CDCl}_3$ )  $\delta$  : 6.71(s, 1H), 7.49-7.54(m, 2H), 7.62-7.67(m, 1H), 8.07-8.10(m, 2H),  $^{13}\text{C}$  NMR (75MHz, $\text{CDCl}_3$ )  $\delta$ : 39.69, 128.96(2C), 129.73(2C), 130.87, 134.47, 185.99

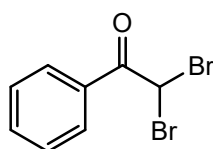

**20. 2-hydroxy-2-phenylethane-1,1-diyl bis(dimethylcarbamoedithioate) (8):** White

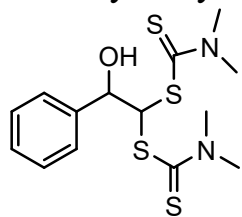

solid,  $^1\text{H}$  NMR (300 MHz,  $\text{CDCl}_3$ )  $\delta$  : 3.33-3.37(m, 6H), 3.50-3.55(m, 7H), 5.66-5.67(broad, 1H), 6.64(m, 1H), 7.28-7.39(m, 3H), 7.66-7.68(m, 2H),  $^{13}\text{C}$  NMR (75MHz, $\text{CDCl}_3$ )  $\delta$ : 41.64, 41.73, 45.16, 45.72, 69.24, 75.15, 126.77(2C), 127.84, 128.06(2C), 140.42, 194.19, 195.20.



## F. $^1\text{H}$ and $^{13}\text{C}$ Spectra of synthesized compounds:

### 1. $^1\text{H}$ NMR (400 MHz, $\text{CDCl}_3$ ) and $^{13}\text{C}$ NMR (100 MHz, $\text{CDCl}_3$ ) spectra of **3a**

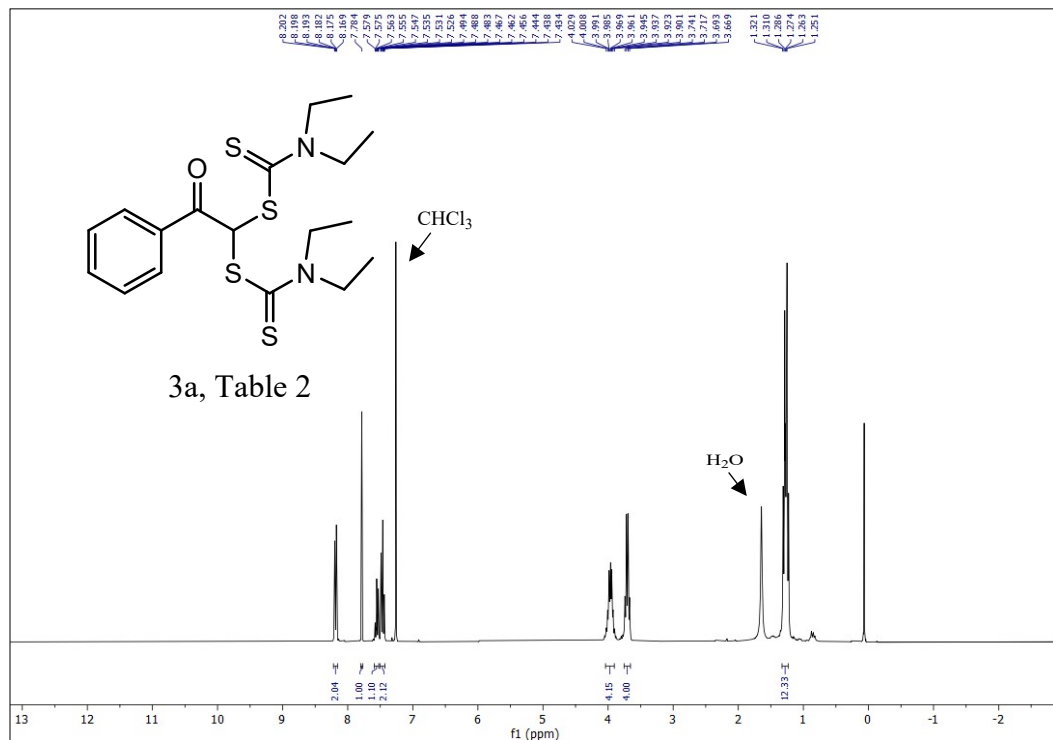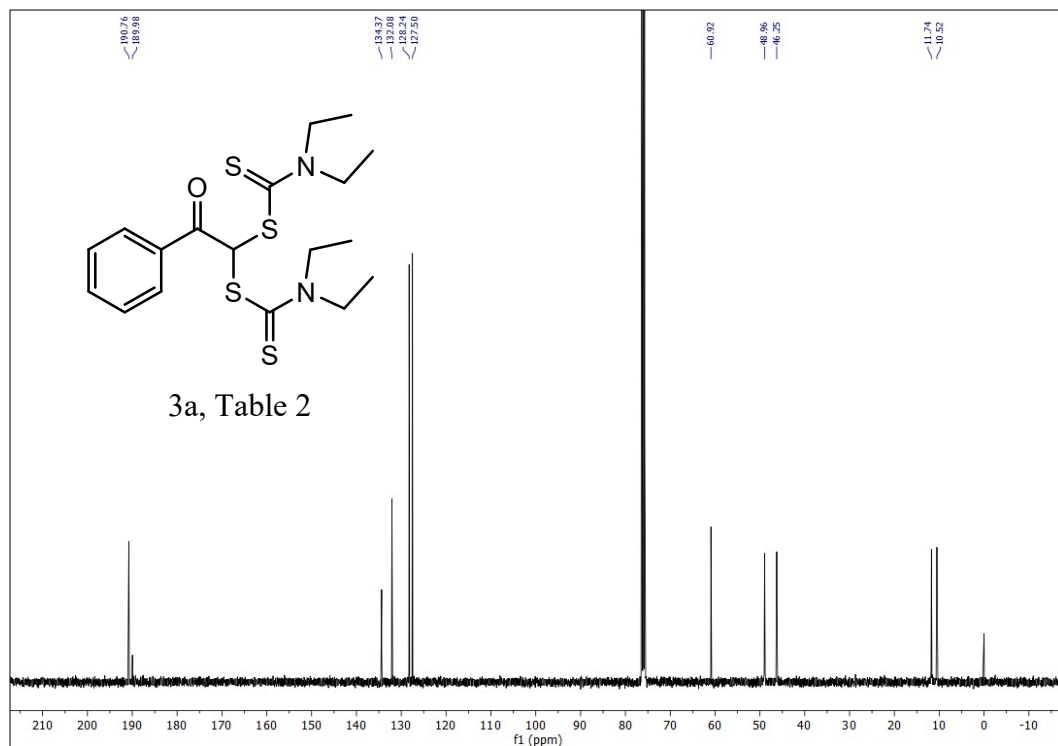

2.  $^1\text{H}$  NMR (400 MHz,  $\text{CDCl}_3$ ) and  $^{13}\text{C}$  NMR (100 MHz,  $\text{CDCl}_3$ ) spectra of **3b**

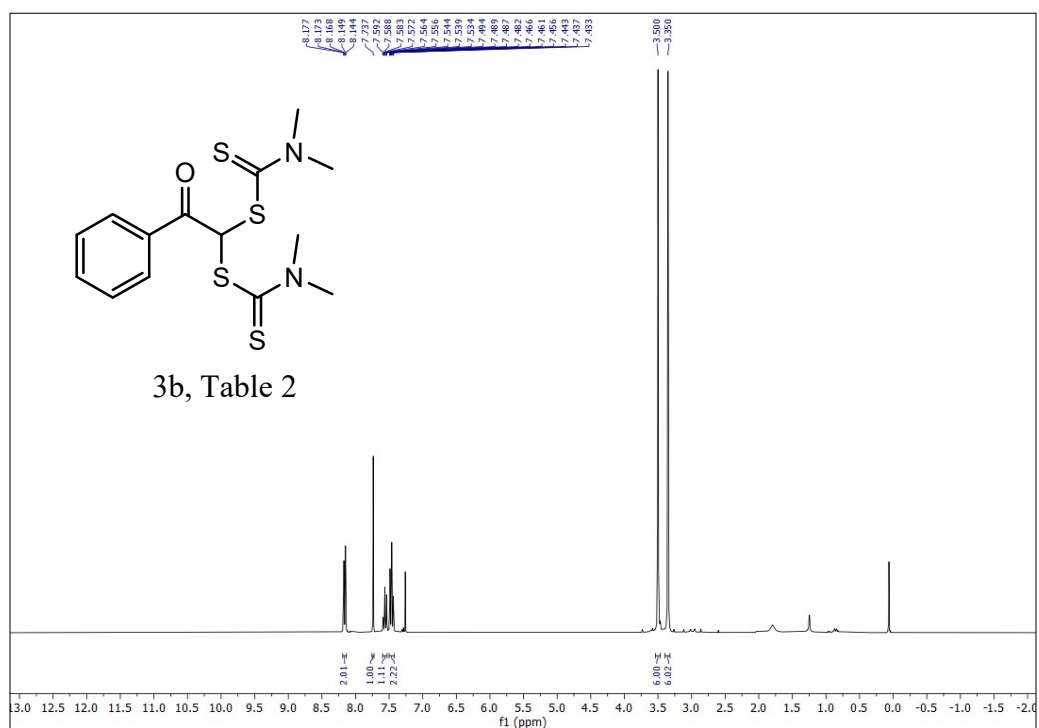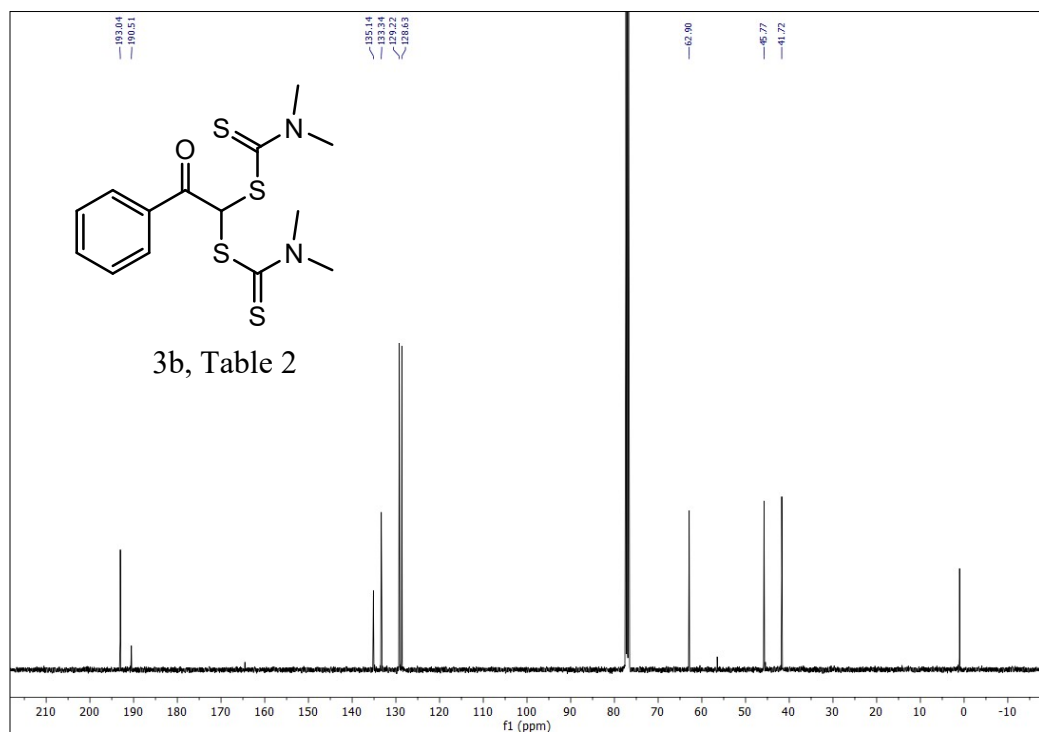

3.  $^1\text{H}$  NMR (400 MHz,  $\text{CDCl}_3$ ) and  $^{13}\text{C}$  NMR (100 MHz,  $\text{CDCl}_3$ ) spectra of **3c**

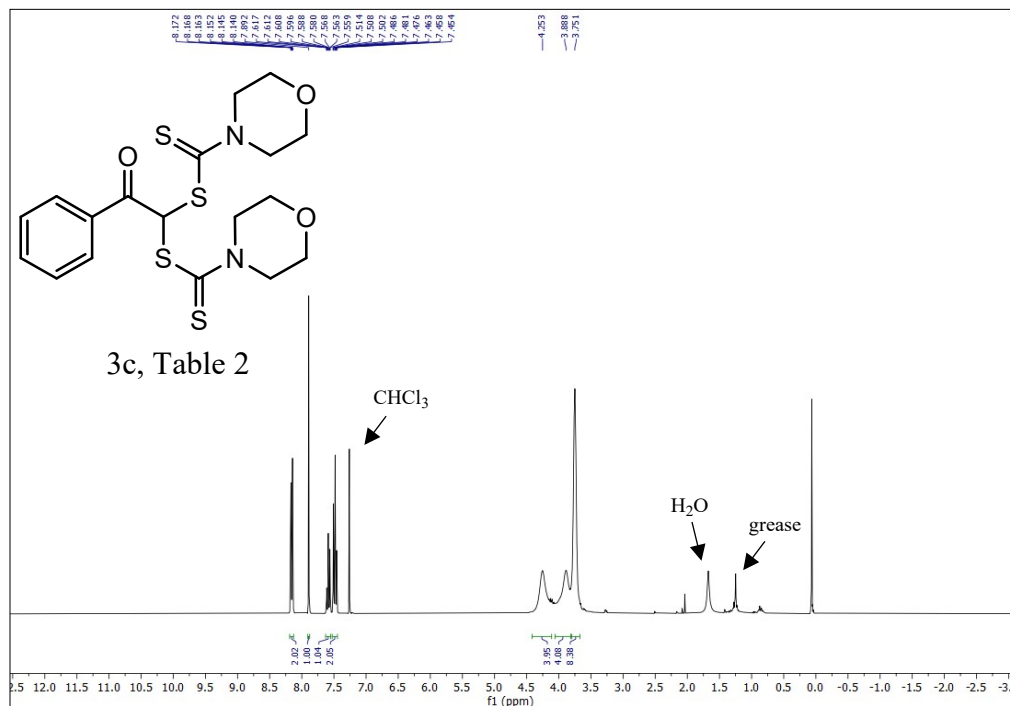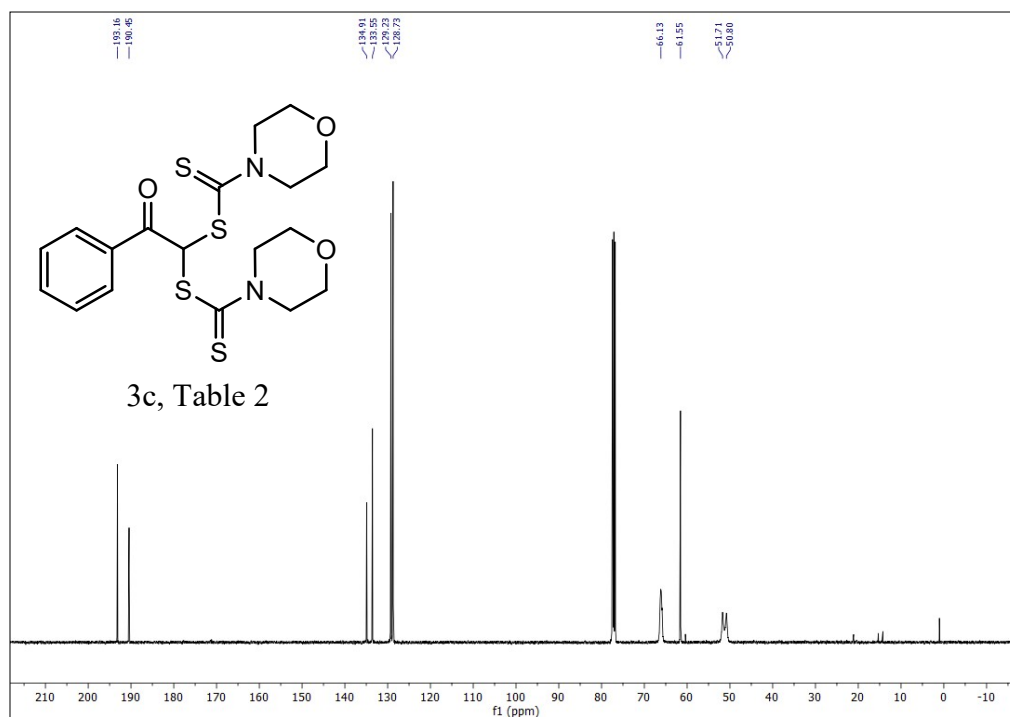

4.  $^1\text{H}$  NMR (400 MHz,  $\text{CDCl}_3$ ) and  $^{13}\text{C}$  NMR (100 MHz,  $\text{CDCl}_3$ ) spectra of **3d**

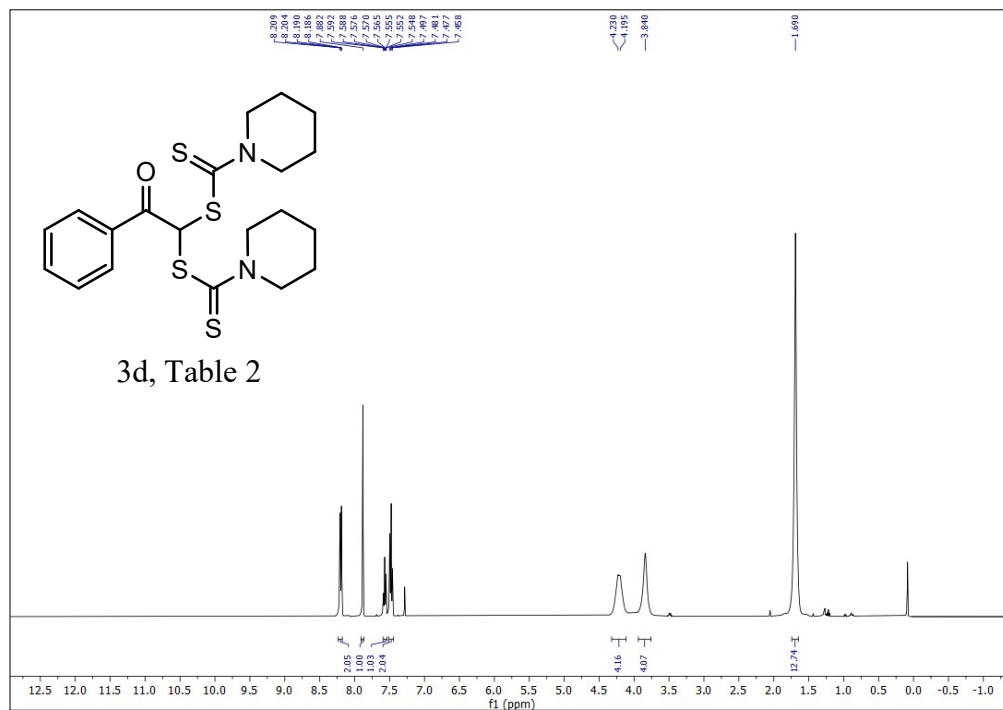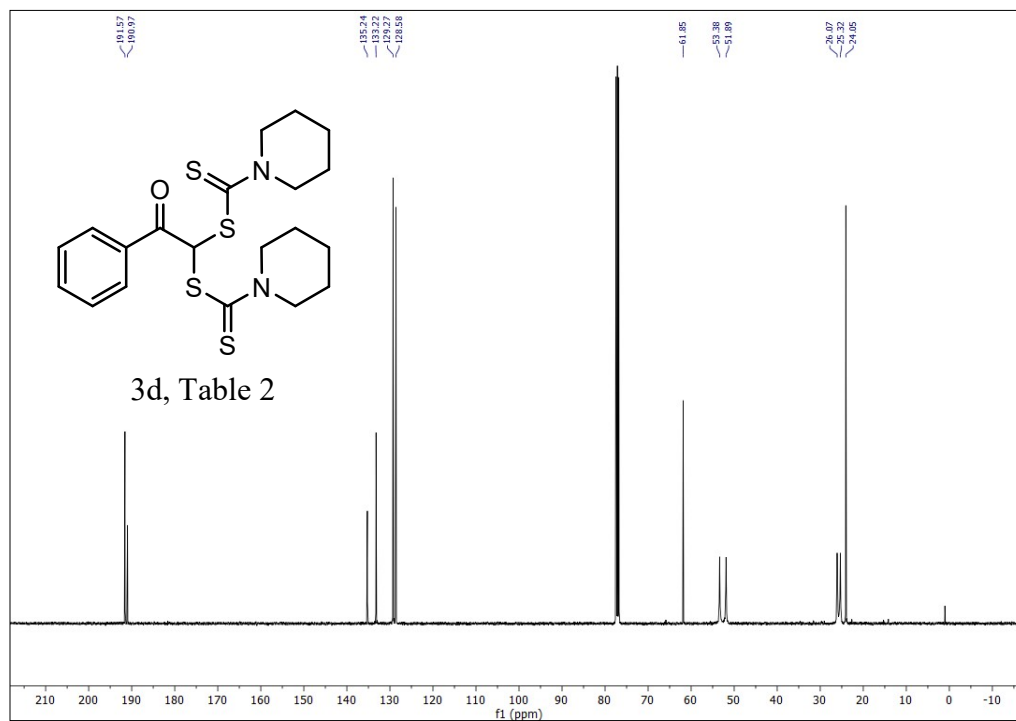

5.  $^1\text{H}$  NMR (400 MHz,  $\text{CDCl}_3$ ) and  $^{13}\text{C}$  NMR (100 MHz,  $\text{CDCl}_3$ ) spectra of **3e**

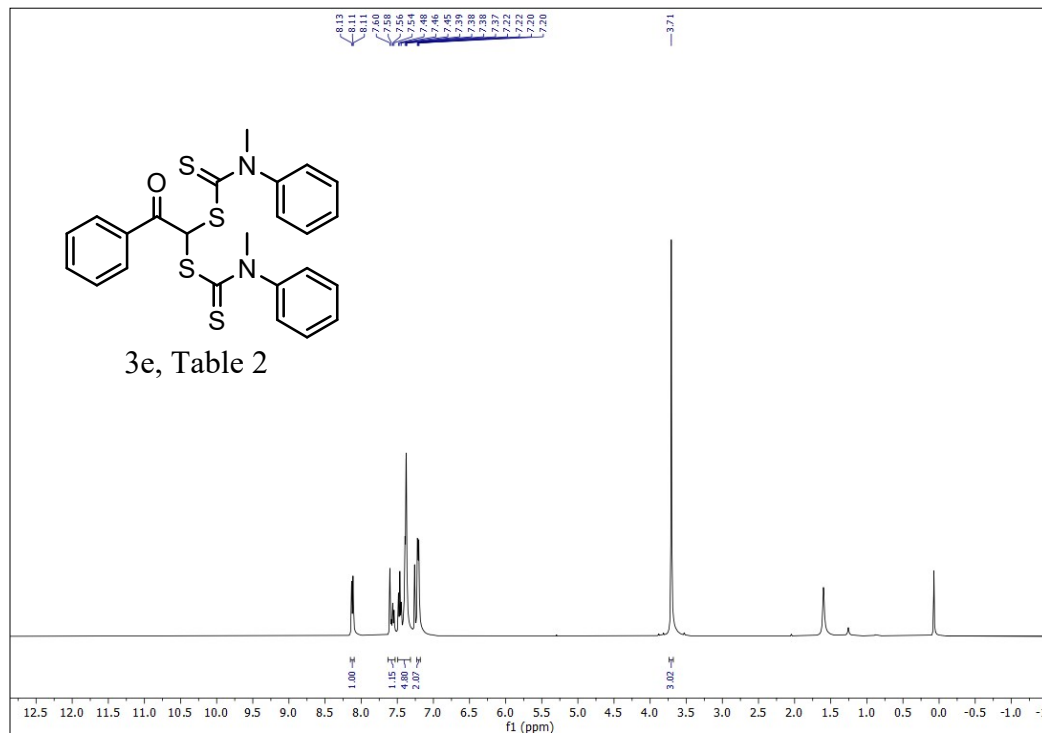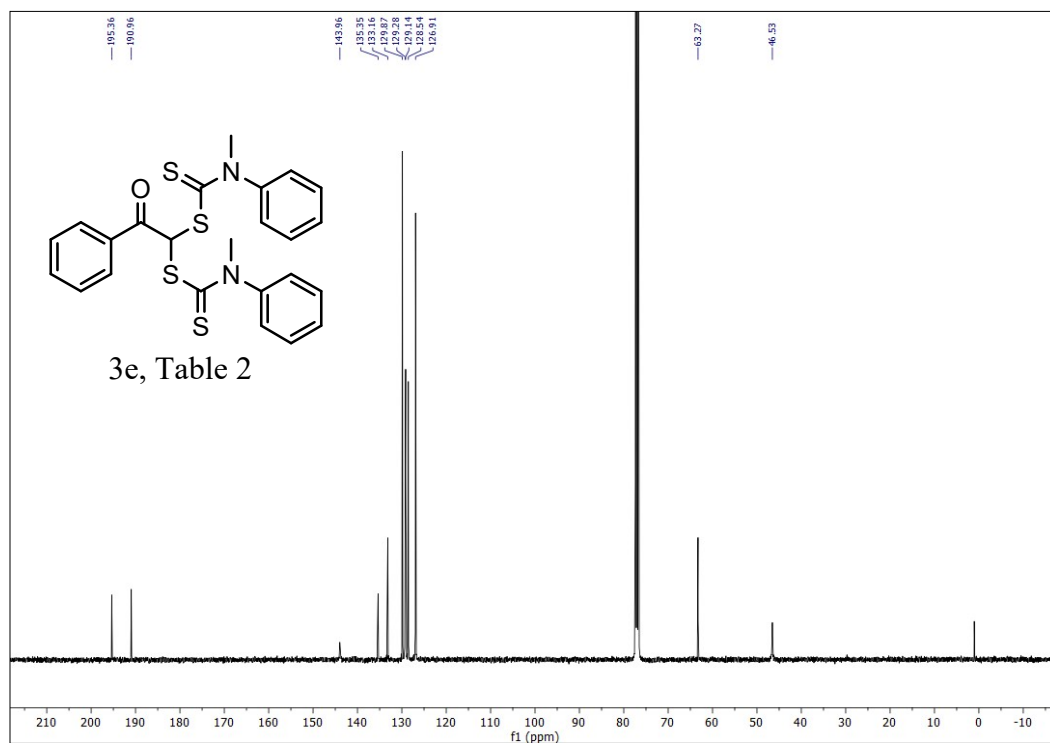

6.  $^1\text{H}$  NMR (300 MHz,  $\text{CDCl}_3$ ) and  $^{13}\text{C}$  NMR (75 MHz,  $\text{CDCl}_3$ ) spectra of **3f**

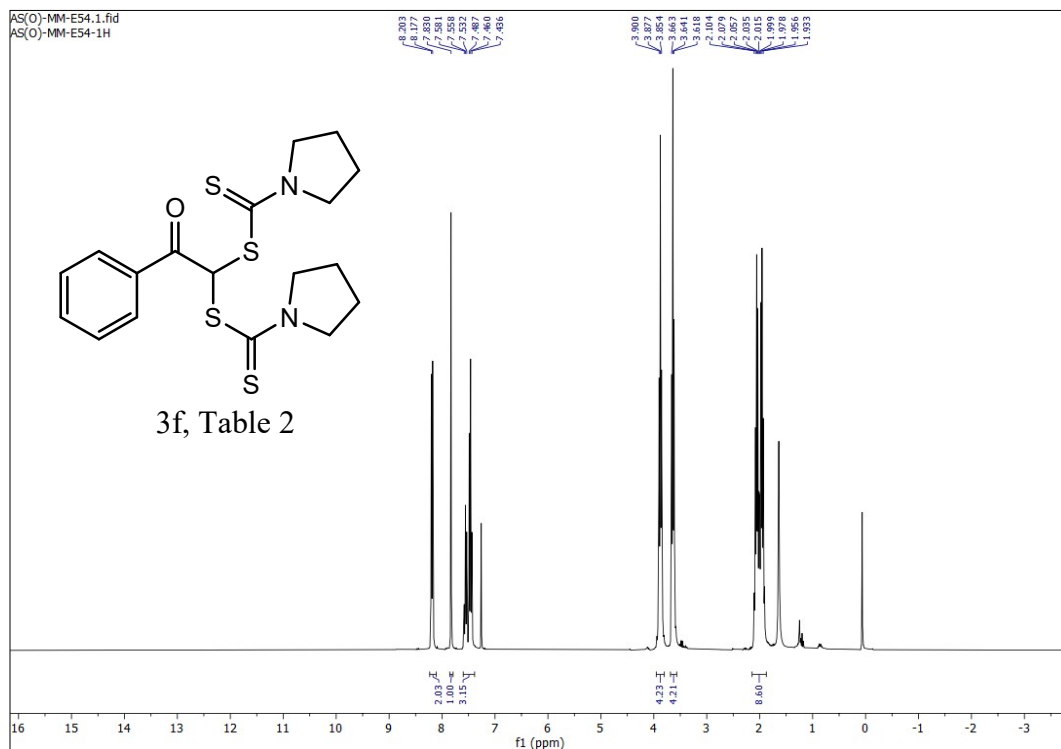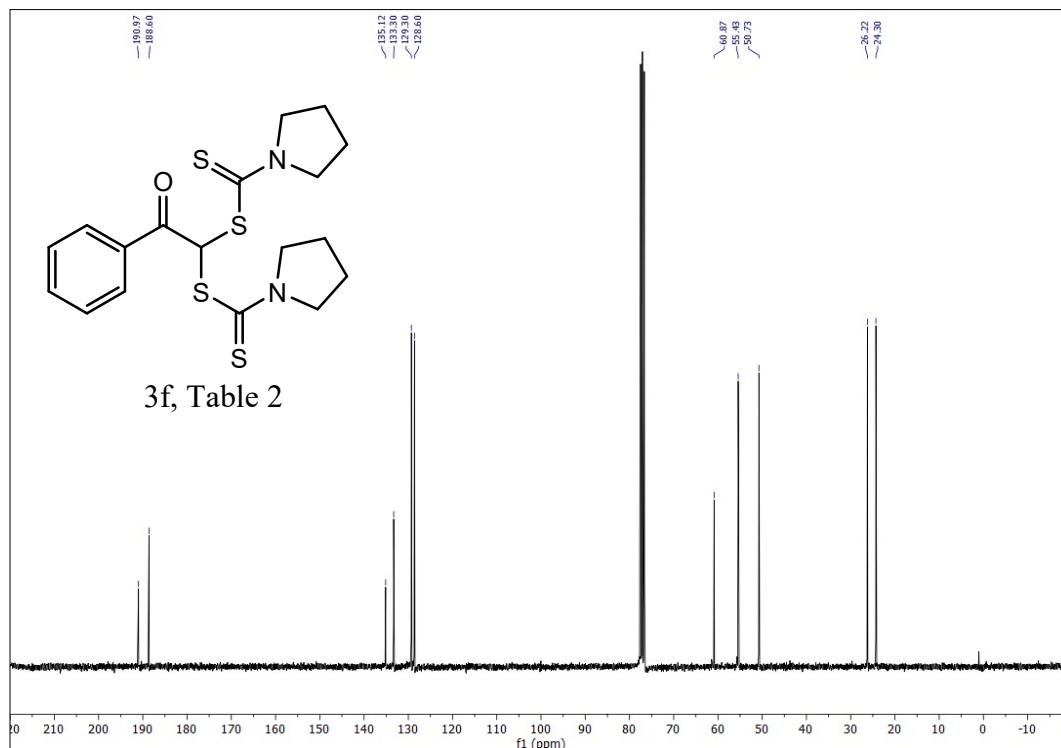

7.  $^1\text{H}$  NMR (300 MHz,  $\text{CDCl}_3$ ) and  $^{13}\text{C}$  NMR (75 MHz,  $\text{CDCl}_3$ ) spectra of **3g**

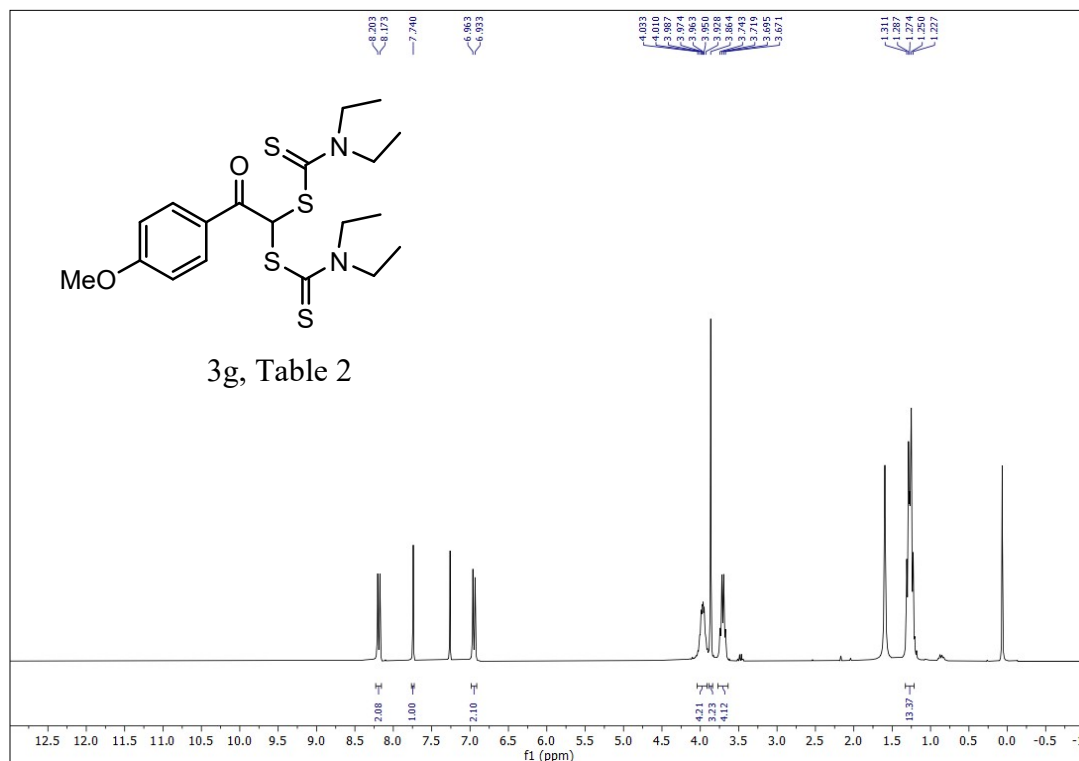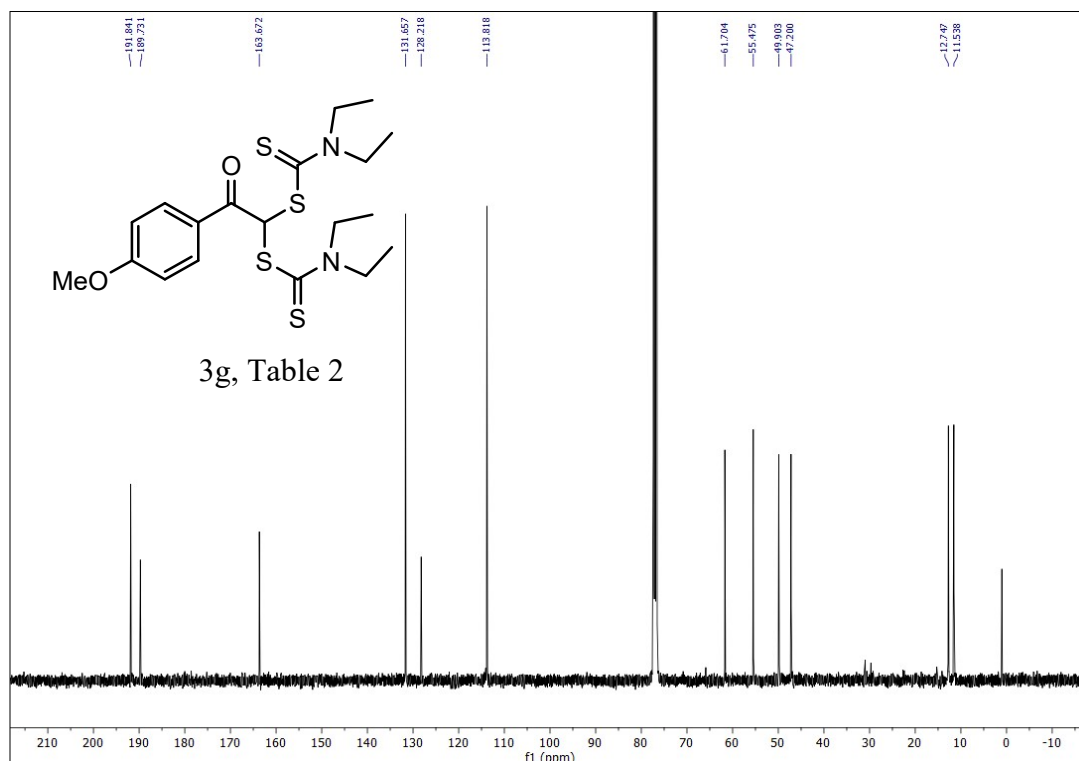

8.  $^1\text{H}$  NMR (300 MHz,  $\text{CDCl}_3$ ) and  $^{13}\text{C}$  NMR (75 MHz,  $\text{CDCl}_3$ ) spectra of **3h**

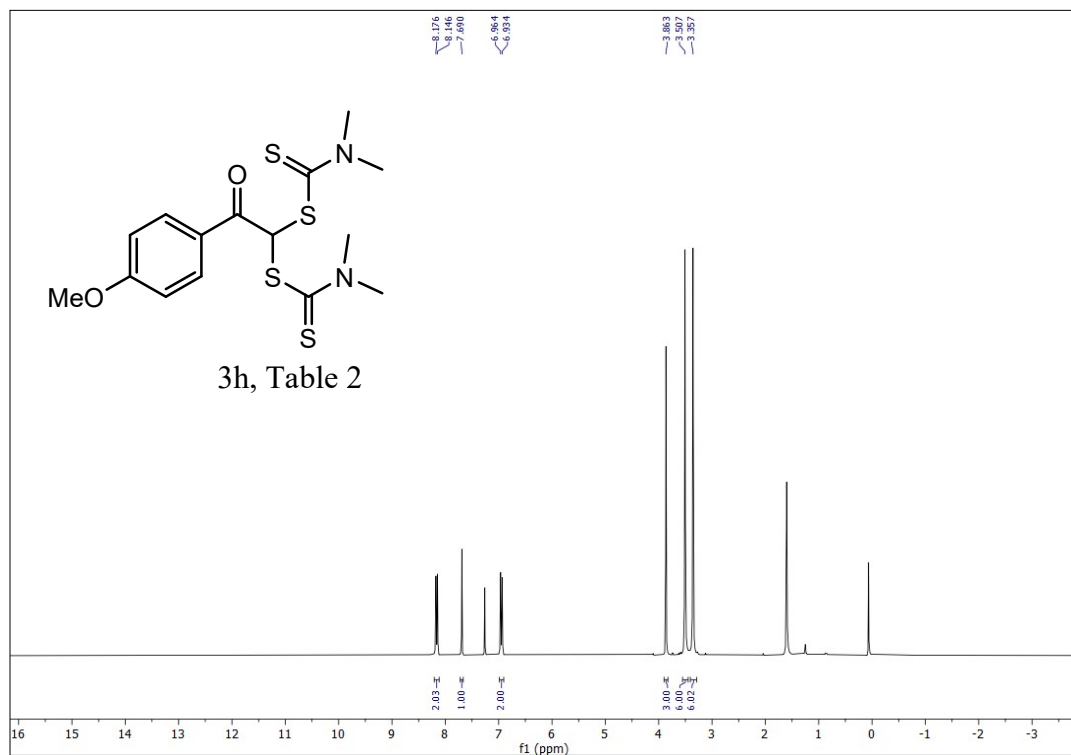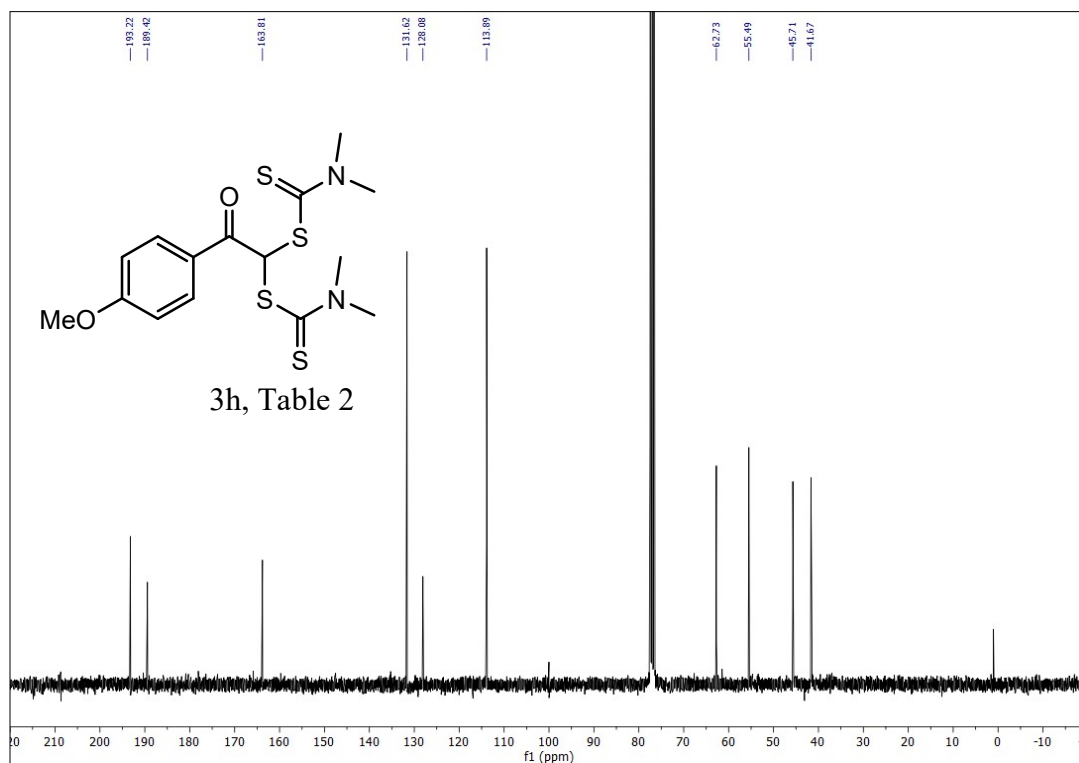



9.  $^1\text{H}$  NMR (400 MHz,  $\text{CDCl}_3$ ) and  $^{13}\text{C}$  NMR (100 MHz,  $\text{CDCl}_3$ ) spectra of **3i**

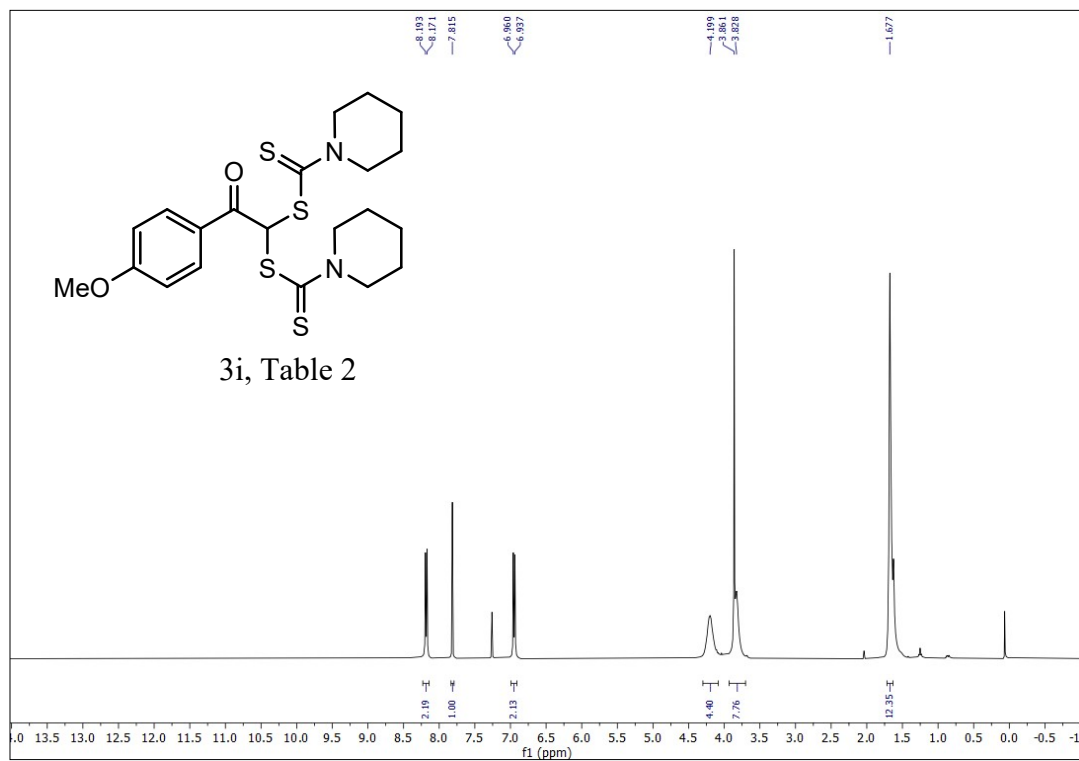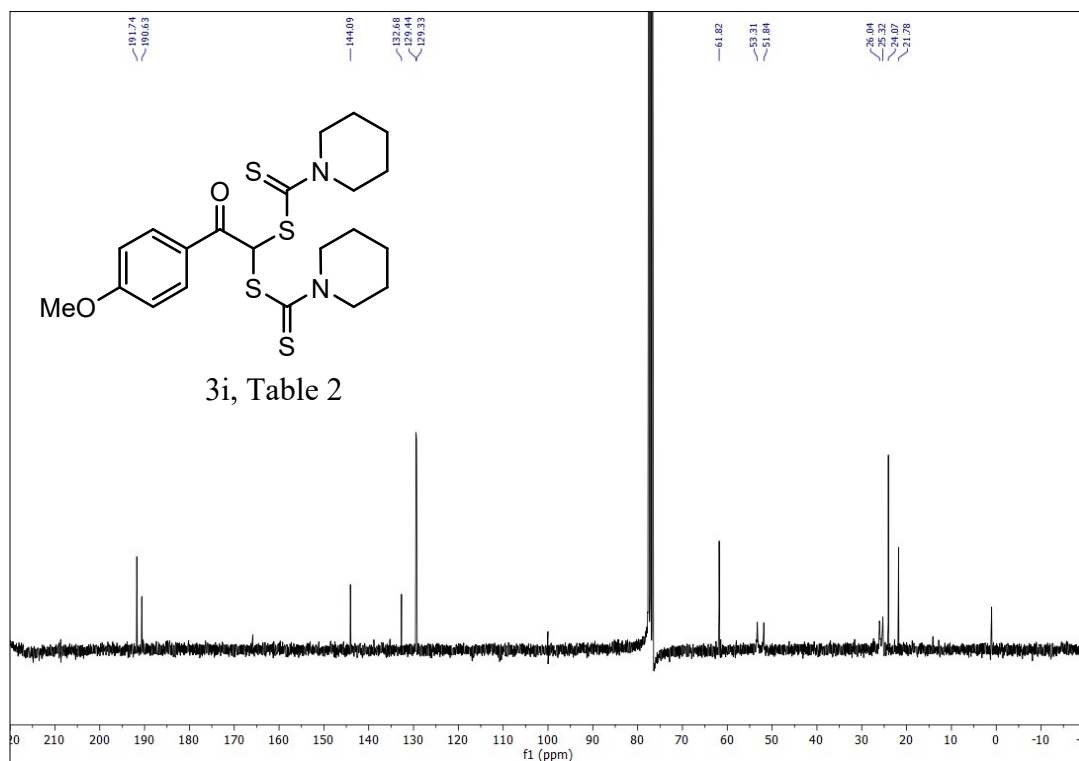

10.  $^1\text{H}$  NMR (300 MHz,  $\text{CDCl}_3$ ) and  $^{13}\text{C}$  NMR (75 MHz,  $\text{CDCl}_3$ ) spectra of **3j**

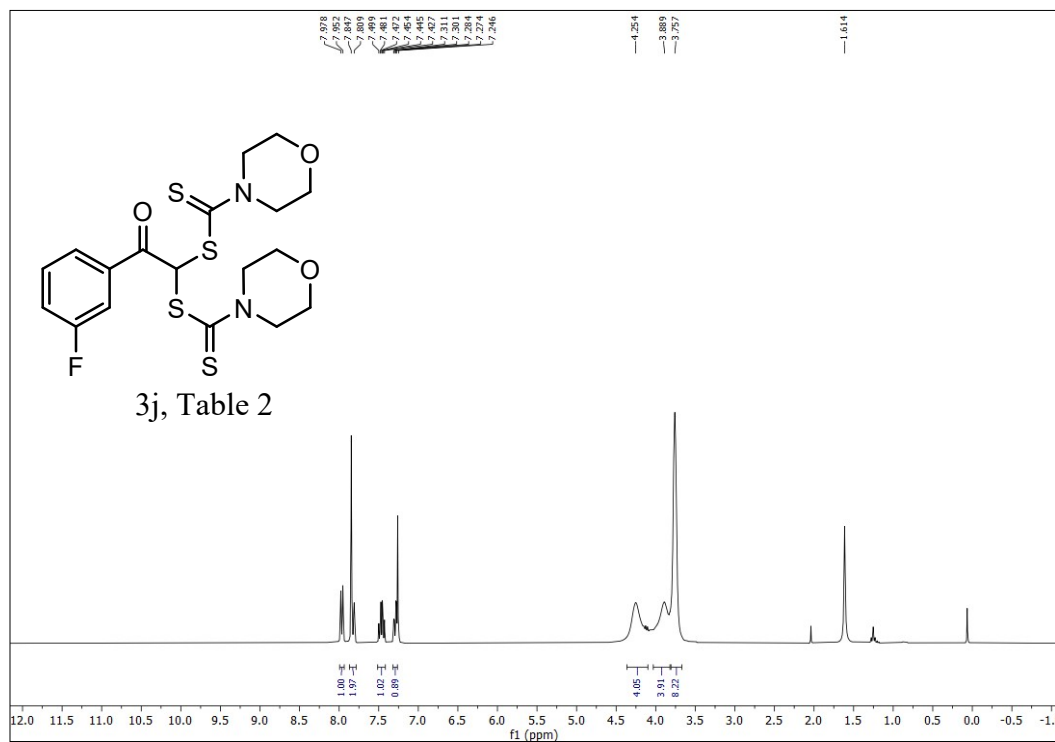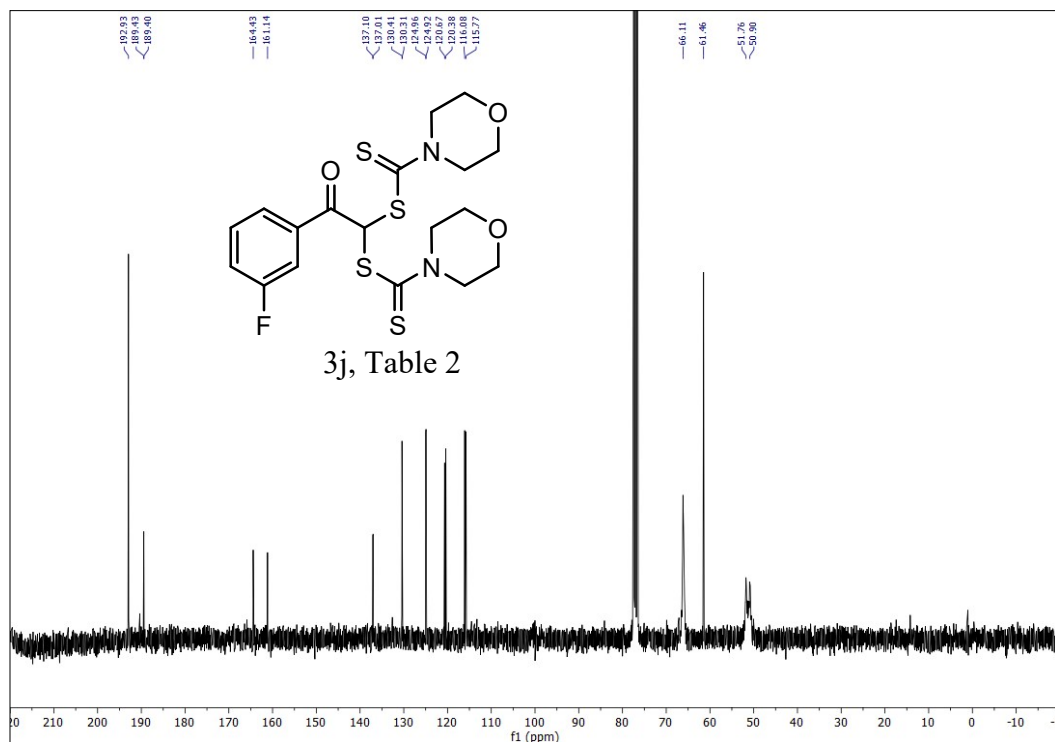

11.  $^1\text{H}$  NMR (300 MHz,  $\text{CDCl}_3$ ) and  $^{13}\text{C}$  NMR (75 MHz,  $\text{CDCl}_3$ ) spectra of **3k**

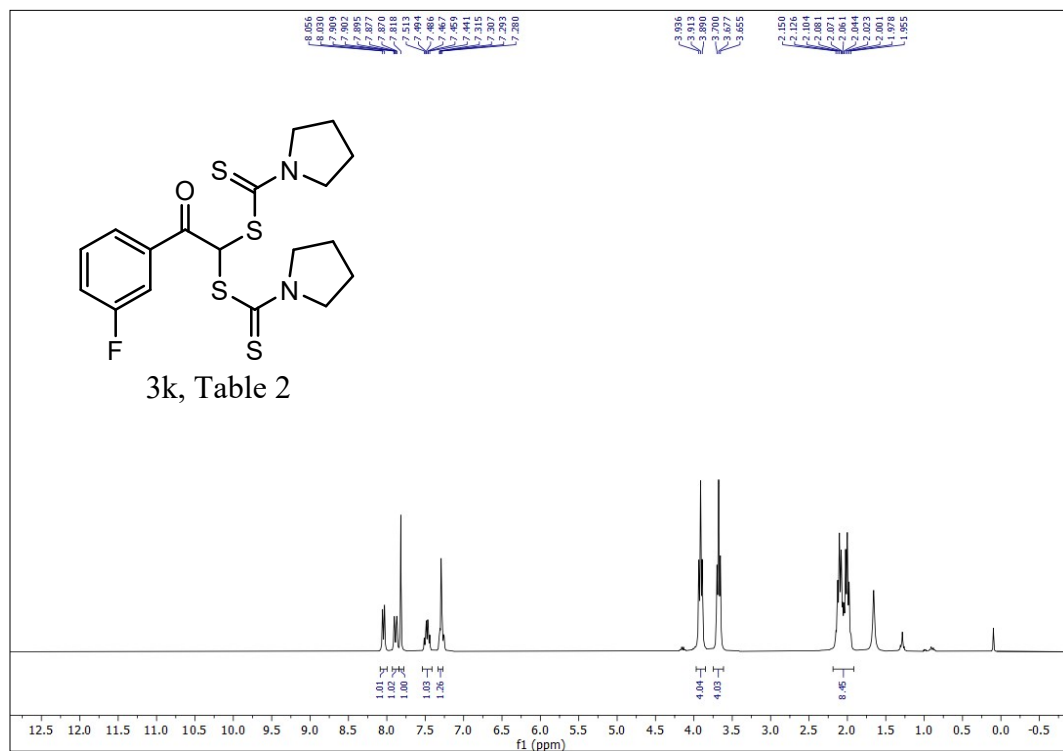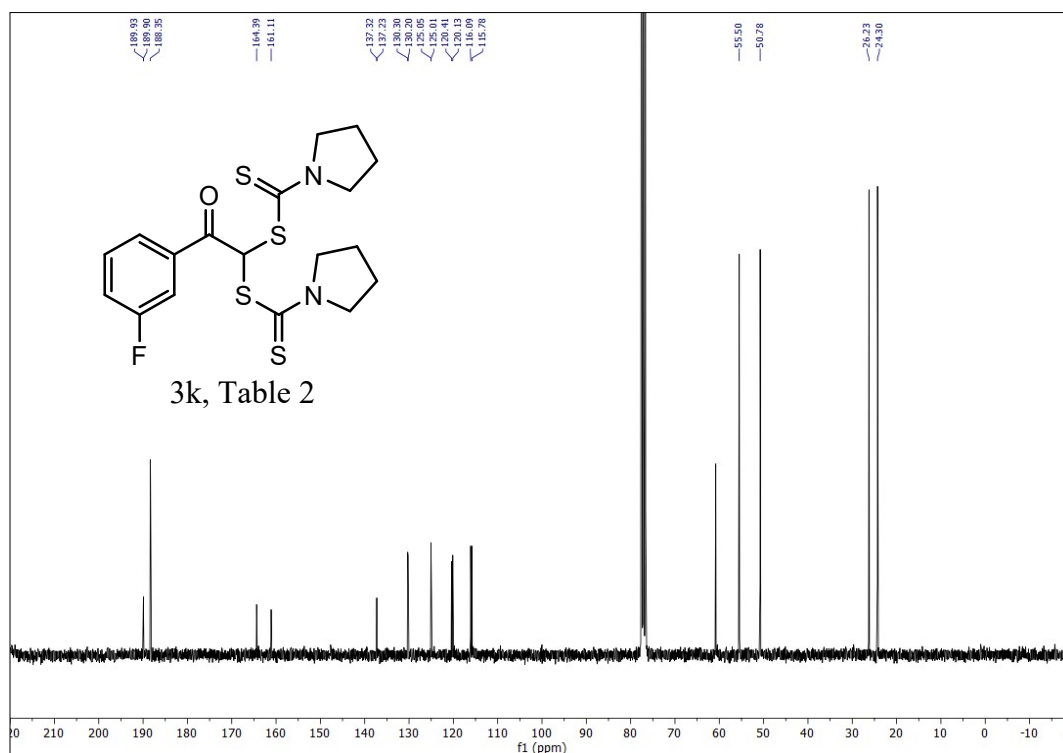

12.  $^1\text{H}$  NMR (300 MHz,  $\text{CDCl}_3$ ) and  $^{13}\text{C}$  NMR (75 MHz,  $\text{CDCl}_3$ ) spectra of **31**

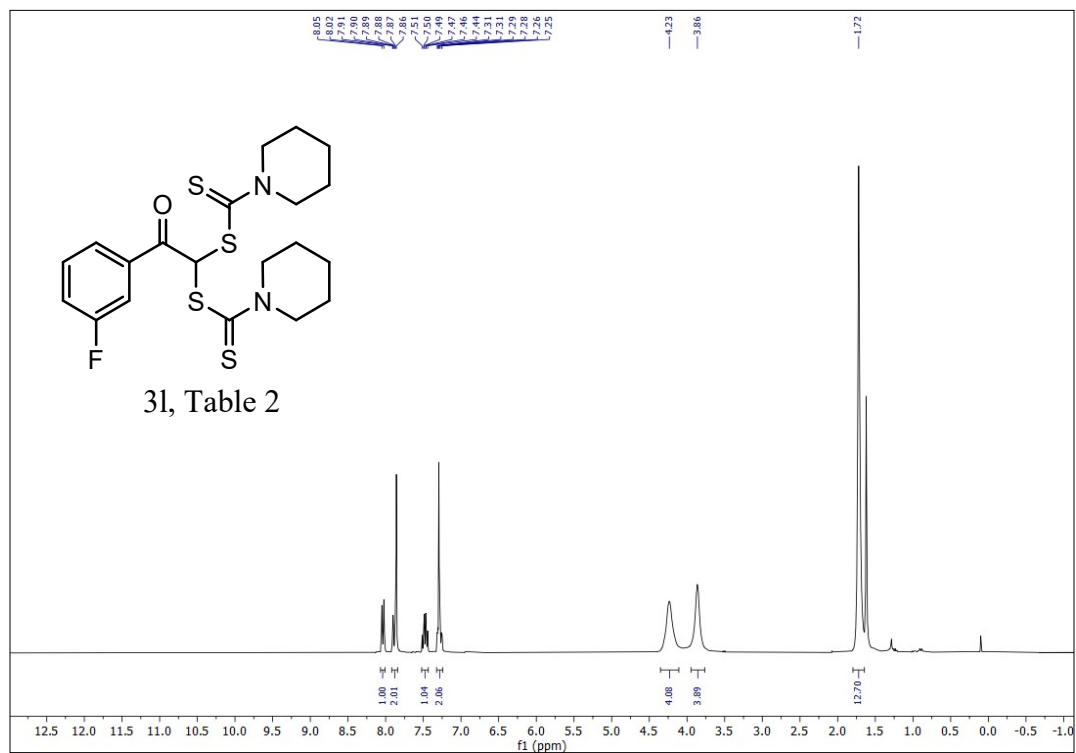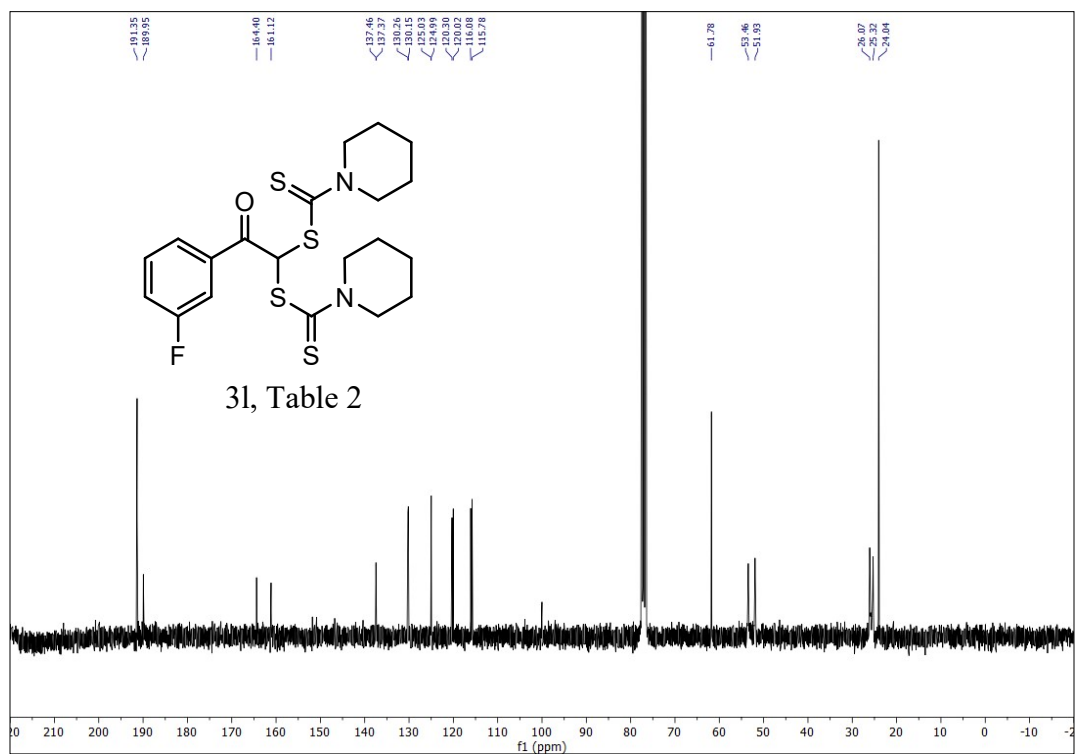

13.  $^1\text{H}$  NMR (300 MHz,  $\text{CDCl}_3$ ) and  $^{13}\text{C}$  NMR (75 MHz,  $\text{CDCl}_3$ ) spectra of **3m**

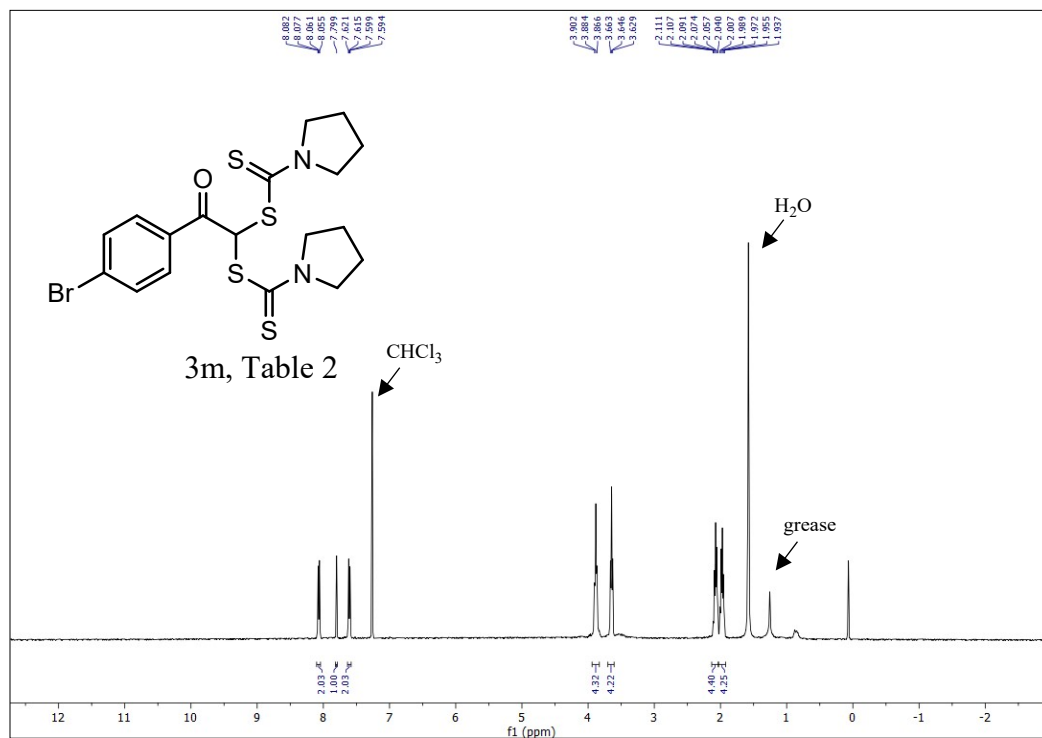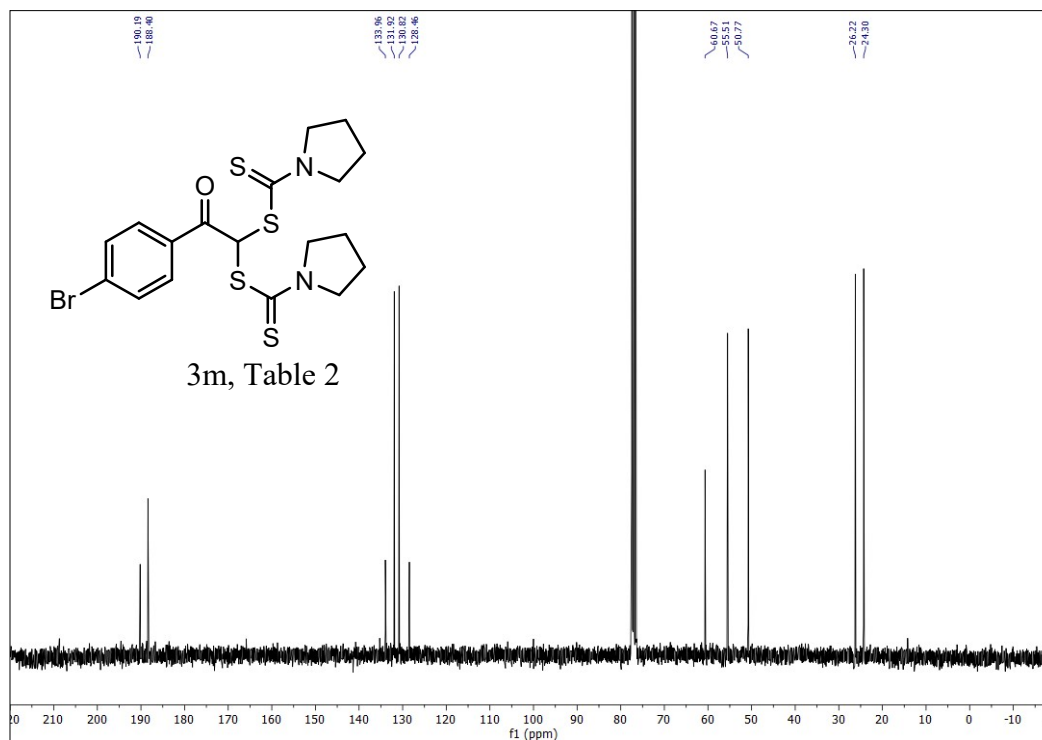

14.  $^1\text{H}$  NMR (300 MHz,  $\text{CDCl}_3$ ) and  $^{13}\text{C}$  NMR (75 MHz,  $\text{CDCl}_3$ ) spectra of **3n**

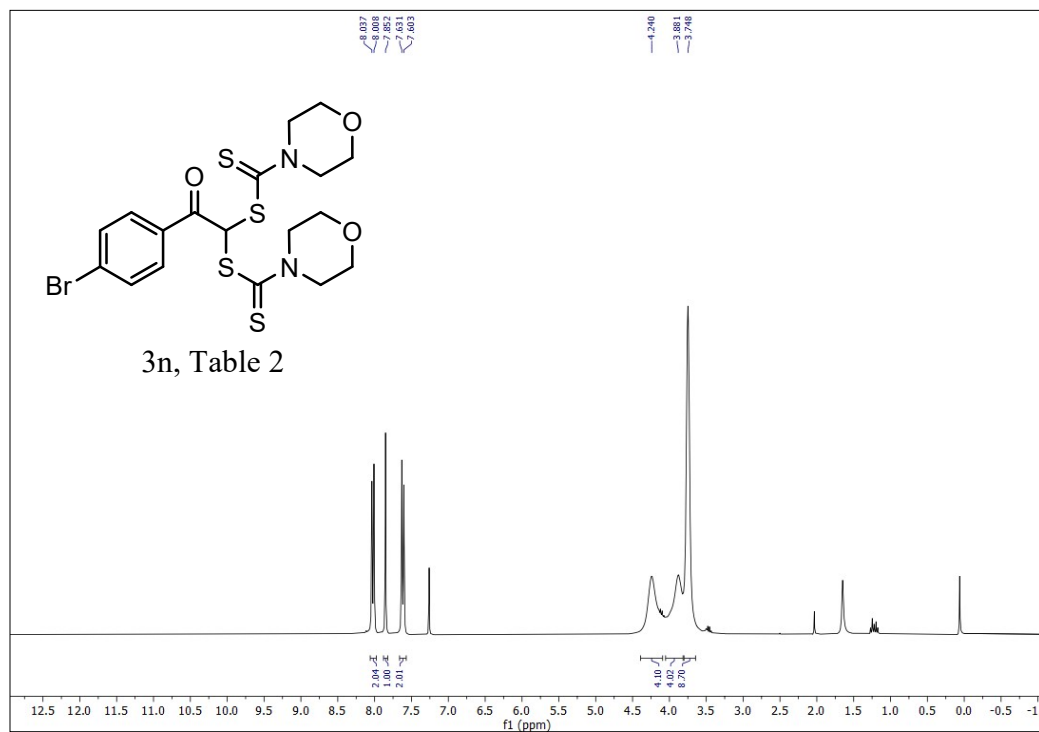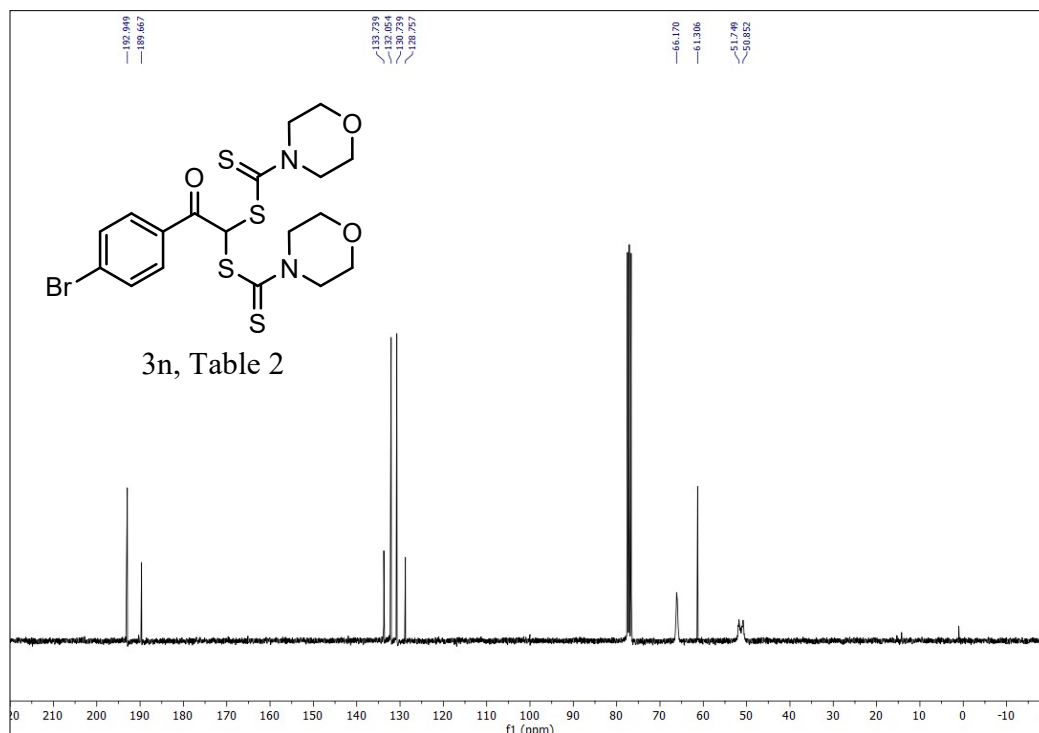

15.  $^1\text{H}$  NMR (300 MHz,  $\text{CDCl}_3$ ) and  $^{13}\text{C}$  NMR (75 MHz,  $\text{CDCl}_3$ ) spectra of **3o**

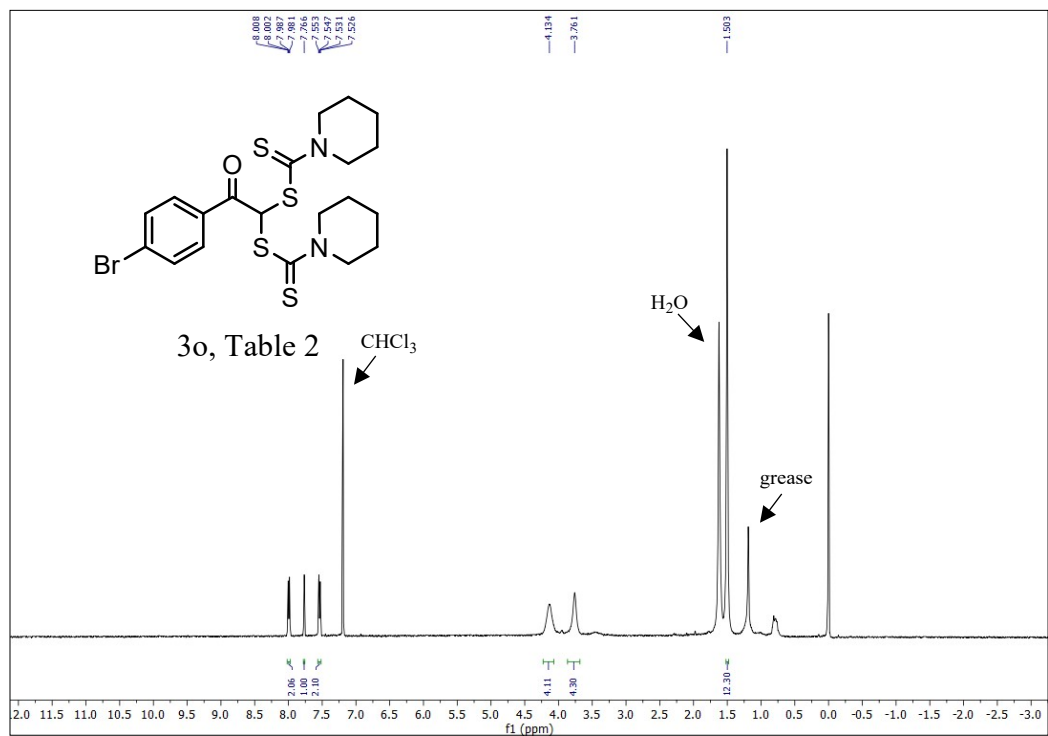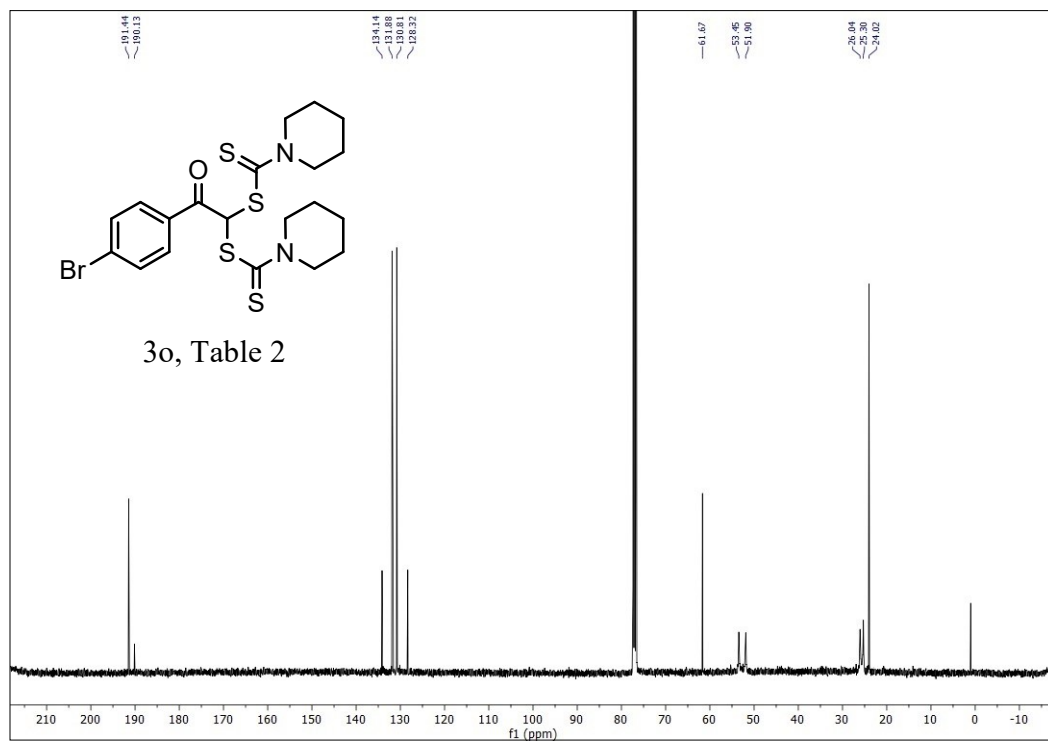

16.  $^1\text{H}$  NMR (400 MHz,  $\text{CDCl}_3$ ) and  $^{13}\text{C}$  NMR (100 MHz,  $\text{CDCl}_3$ ) spectra of **3p**

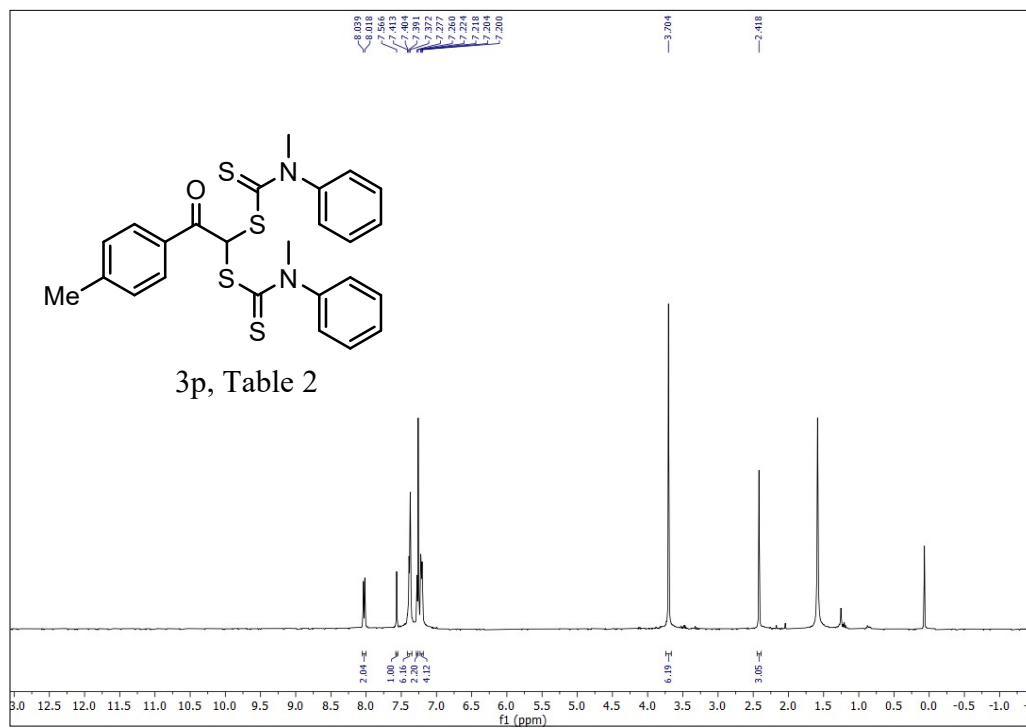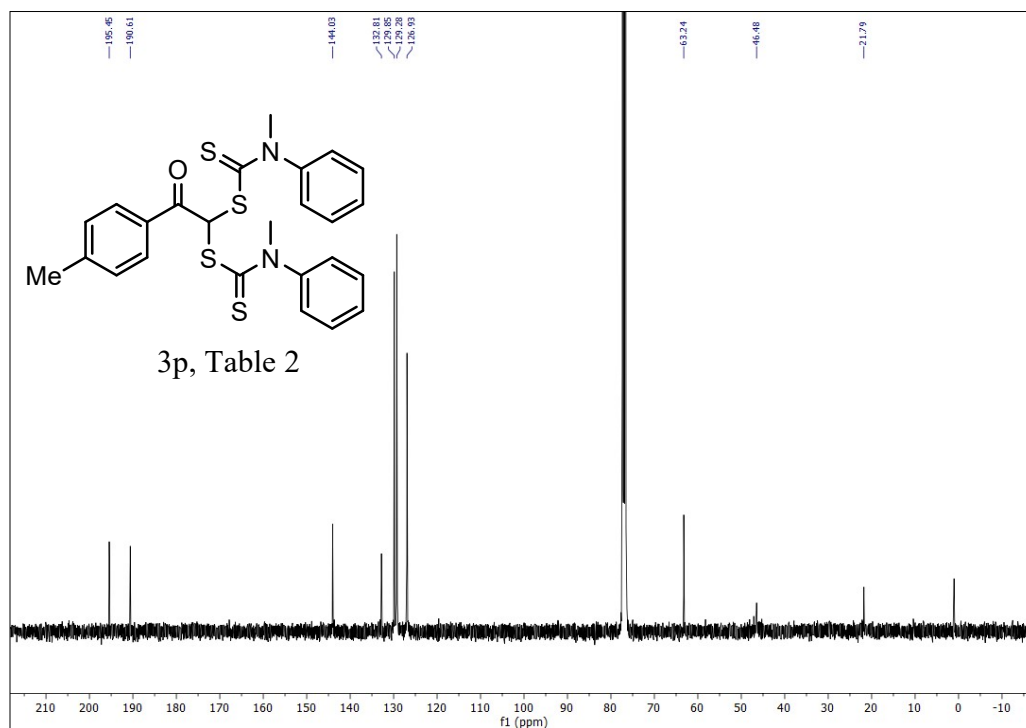



17.  $^1\text{H}$  NMR (300 MHz,  $\text{CDCl}_3$ ) and  $^{13}\text{C}$  NMR (75 MHz,  $\text{CDCl}_3$ ) spectra of **3q**

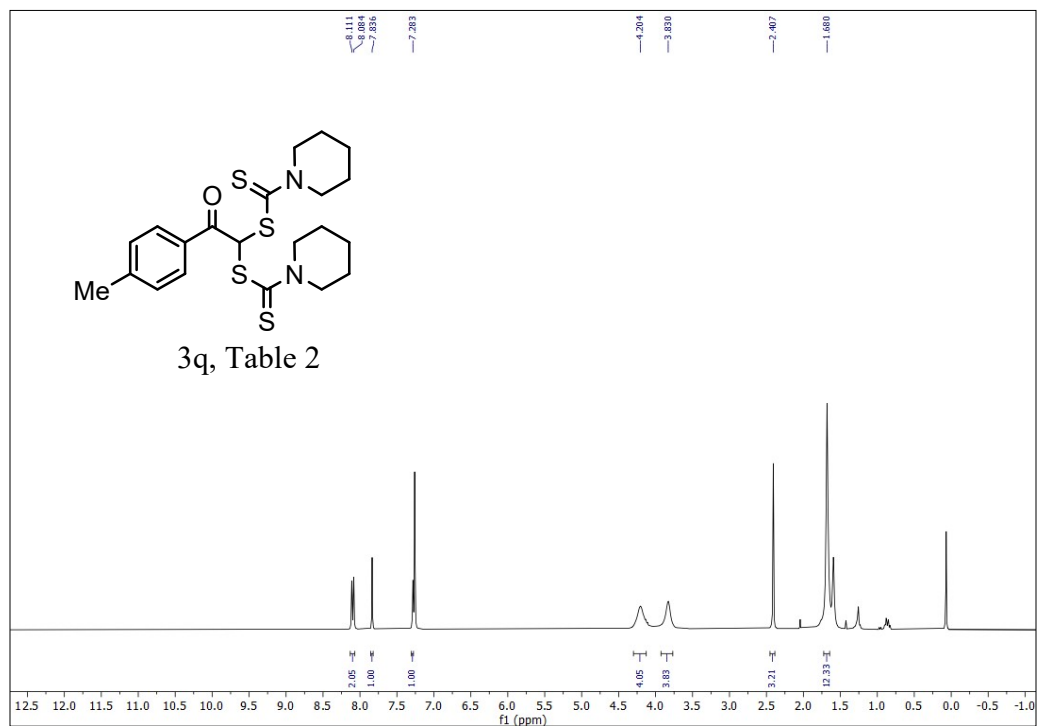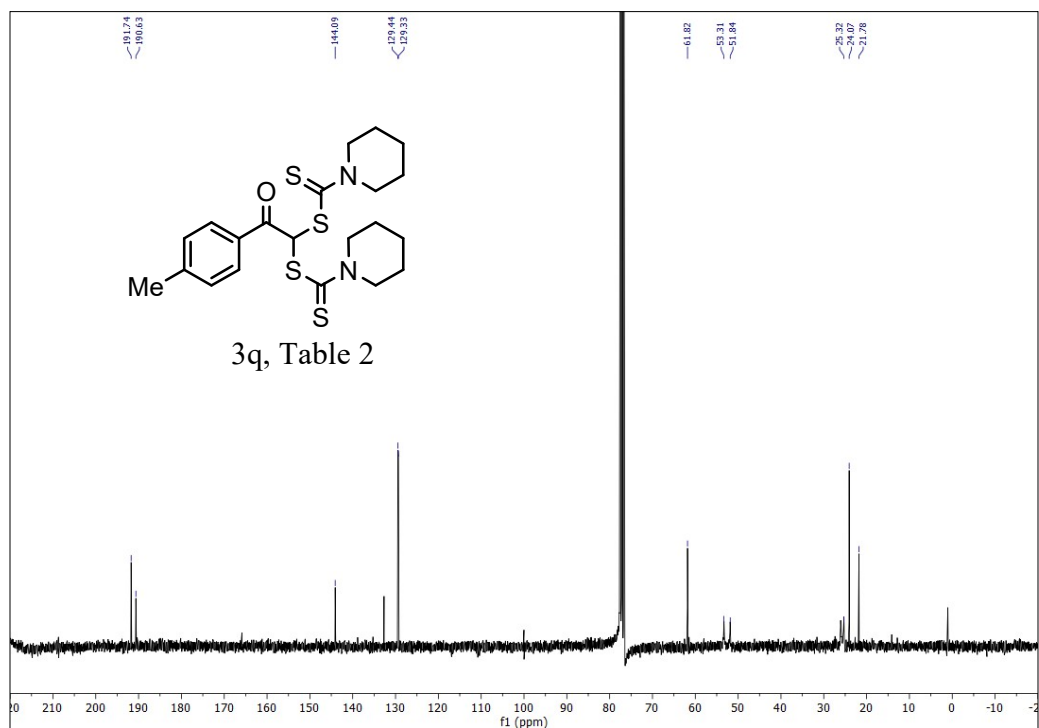

18.  $^1\text{H}$  NMR (300 MHz,  $\text{CDCl}_3$ ) and  $^{13}\text{C}$  NMR (75 MHz,  $\text{CDCl}_3$ ) spectra of **3r**

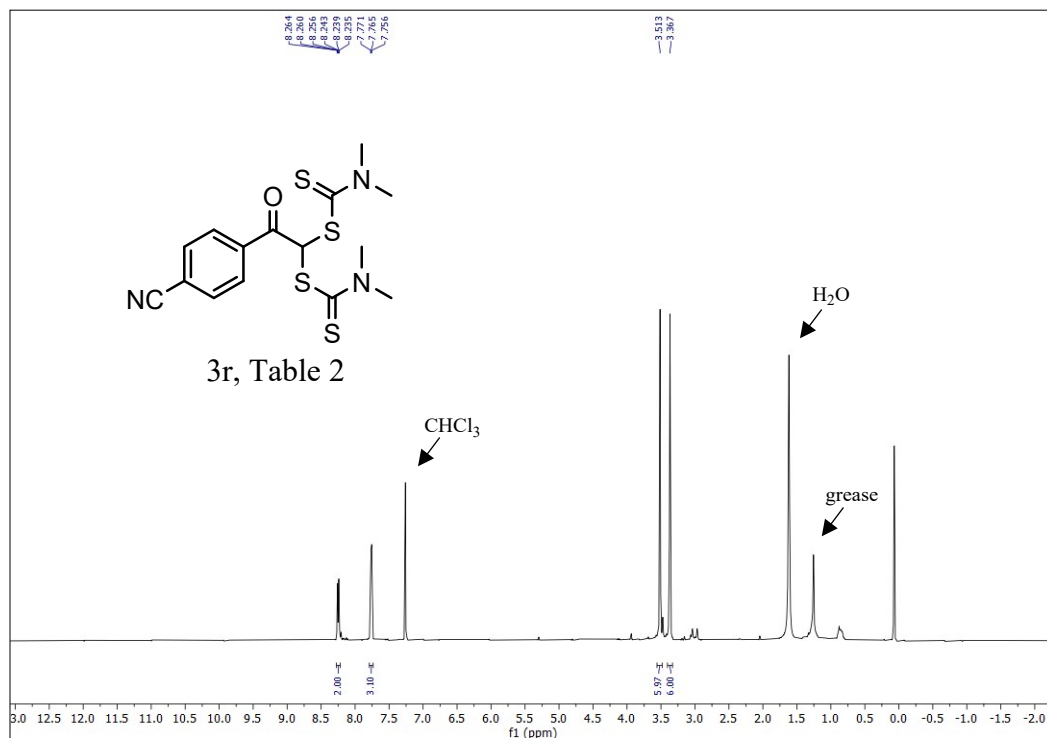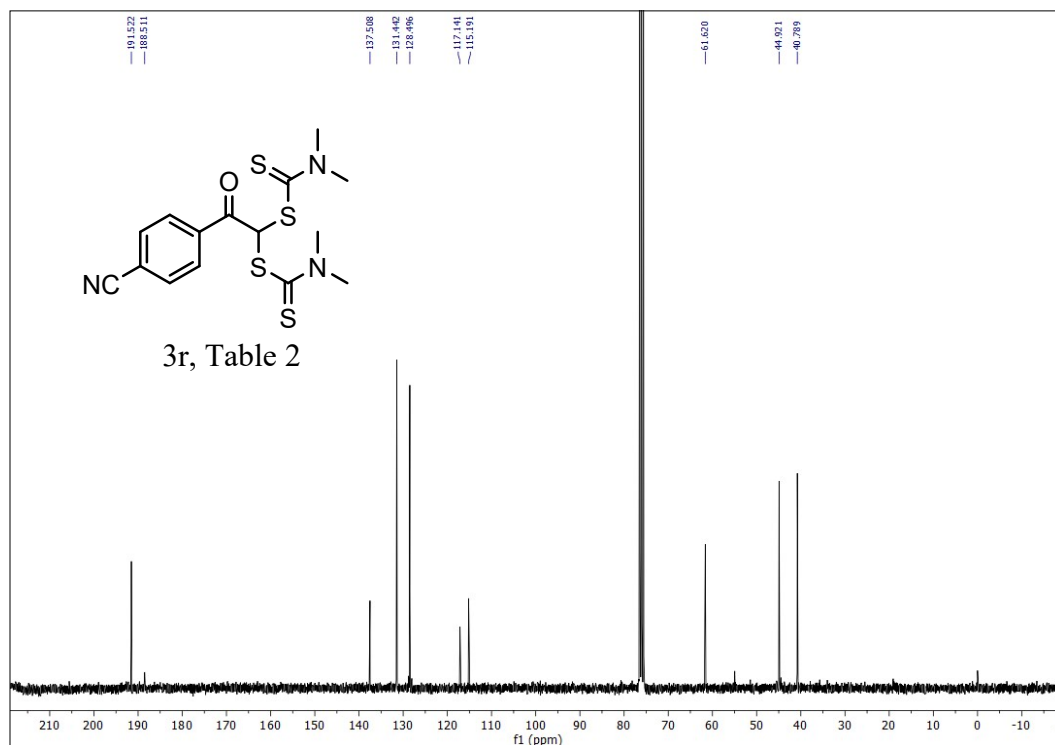

19.  $^1\text{H}$  NMR (300 MHz,  $\text{CDCl}_3$ ) and  $^{13}\text{C}$  NMR (75 MHz,  $\text{CDCl}_3$ ) spectra of **compound 4**

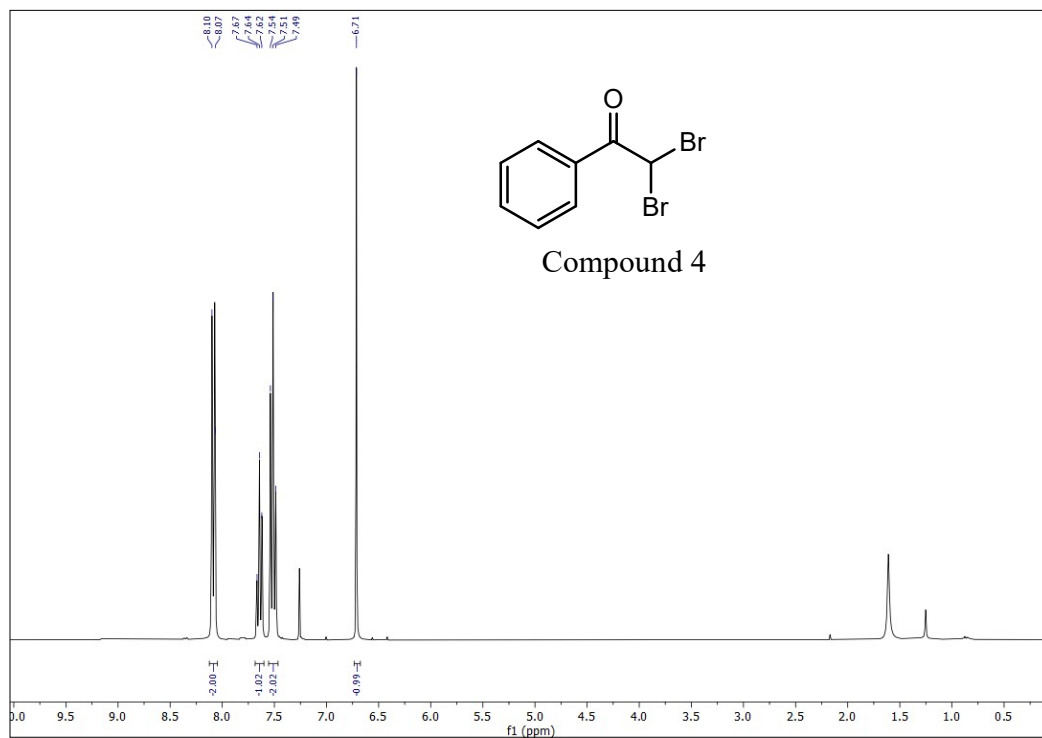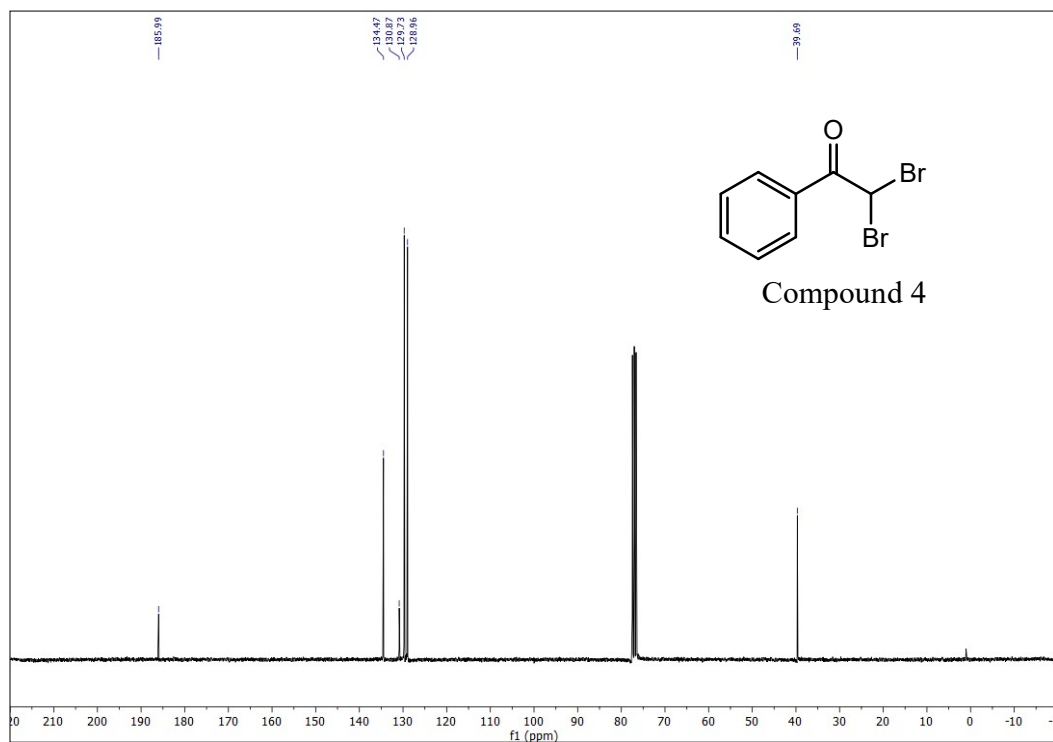

20.  $^1\text{H}$  NMR (300 MHz,  $\text{CDCl}_3$ ) and  $^{13}\text{C}$  NMR (75 MHz,  $\text{CDCl}_3$ ) spectra of **compound 8**

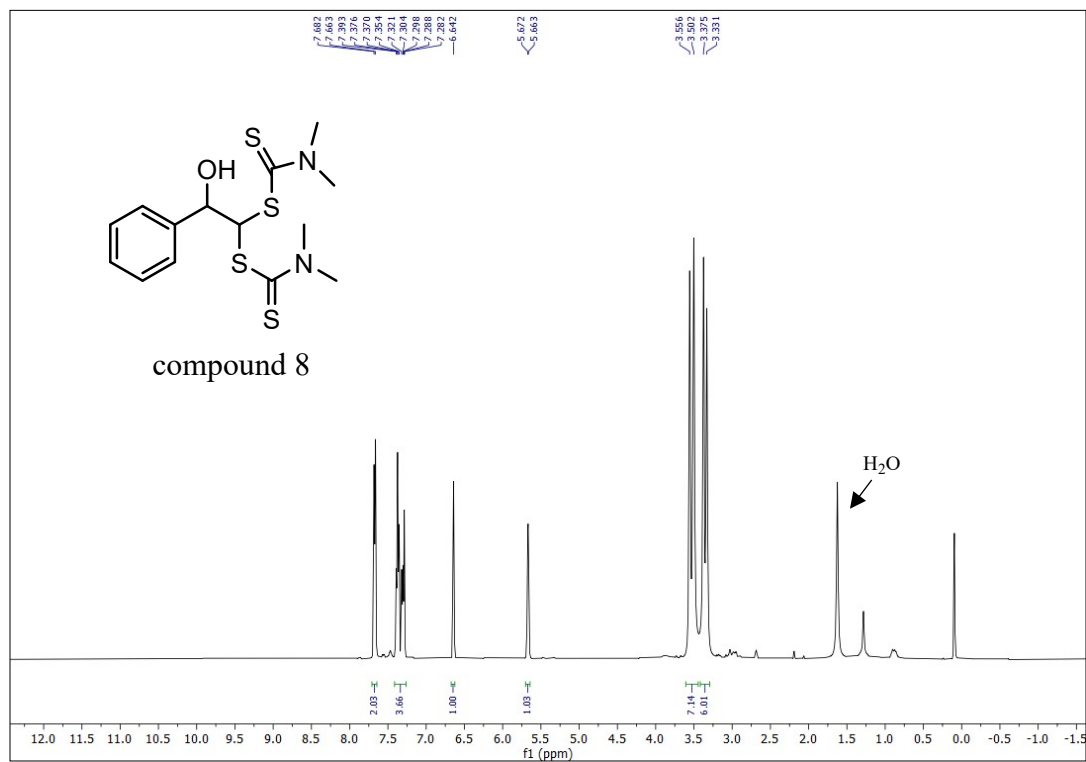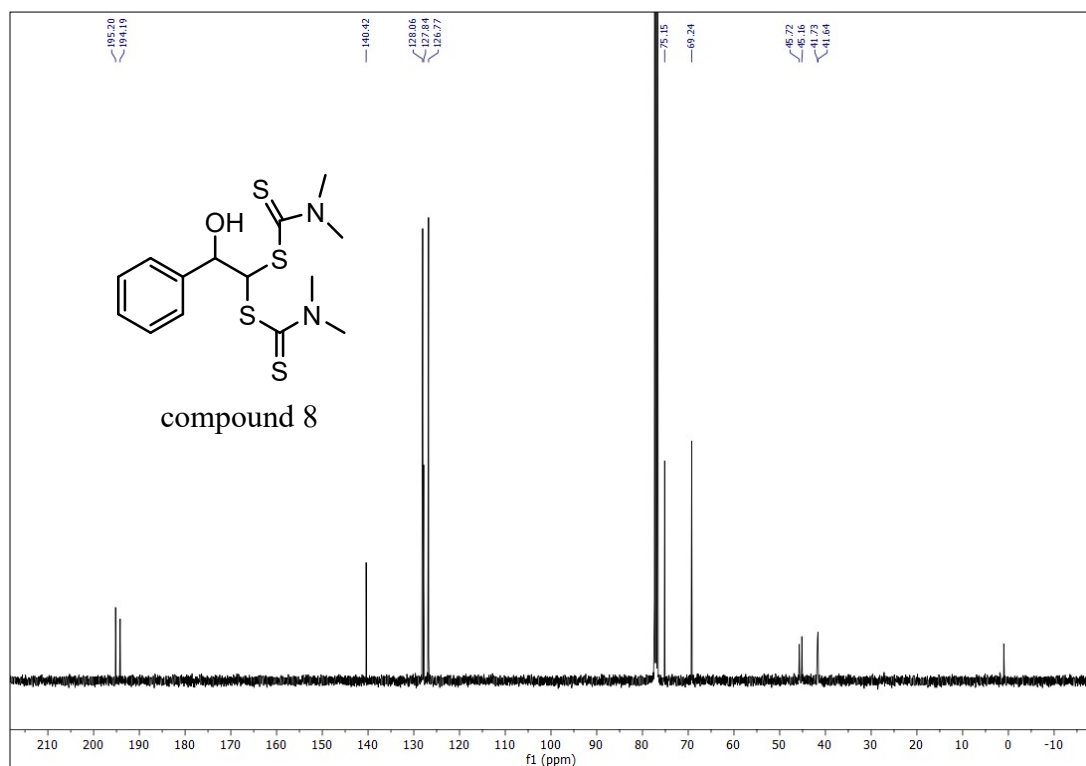

**G.  $^{19}\text{F}$  NMR spectra of fluorinated products (3j, 3k, 3l):**

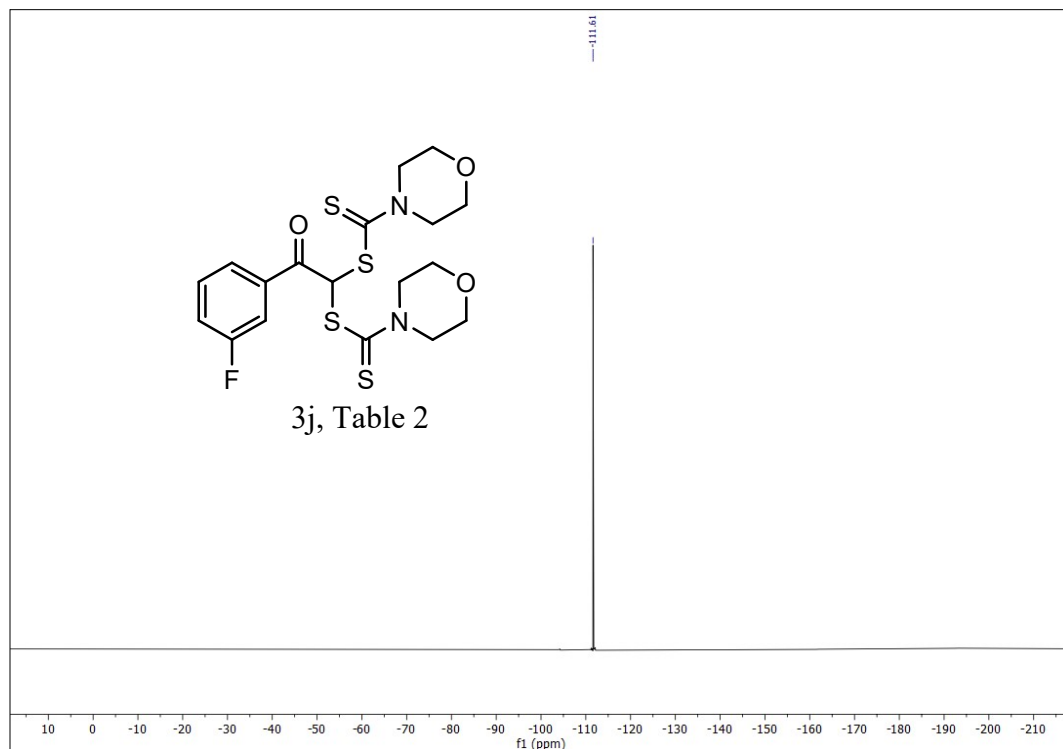

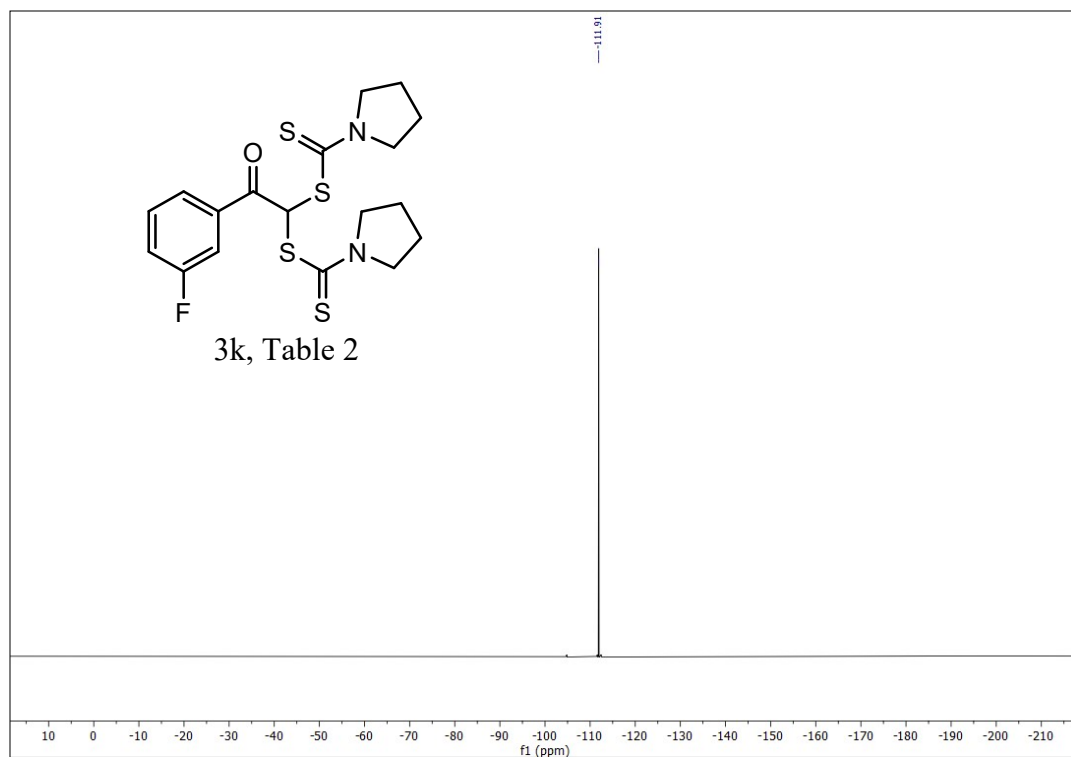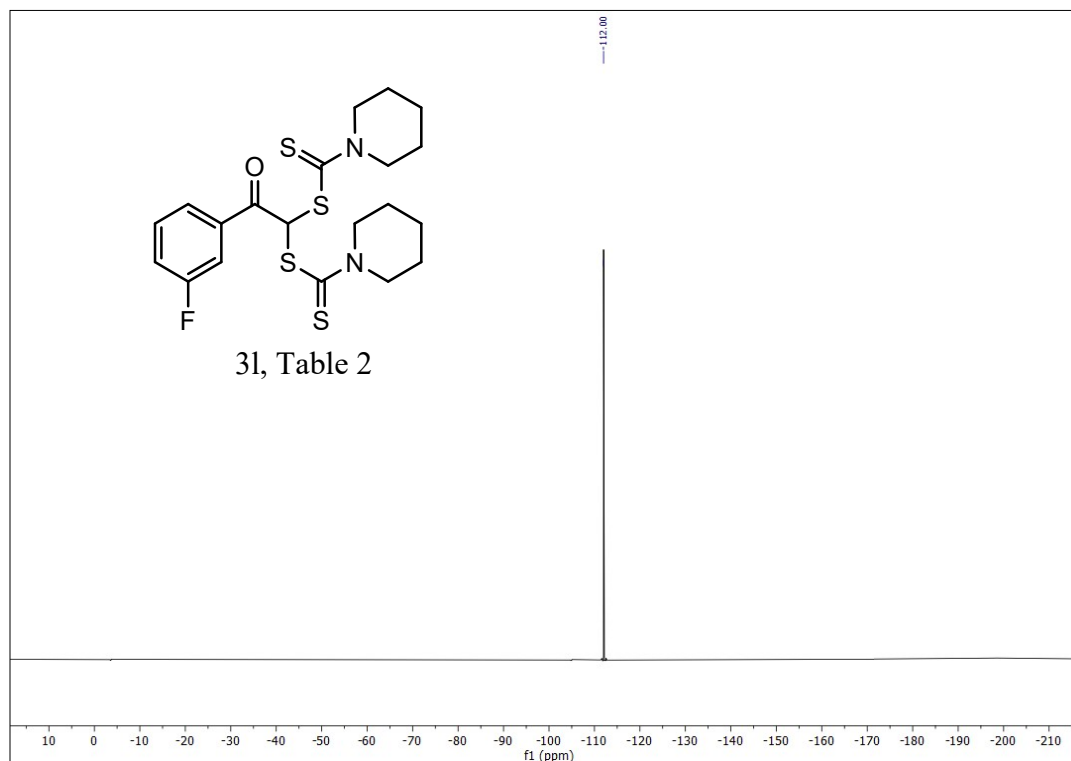

## H. HRMS spectra of few selected products (3b, 3c, 3d, 3e, 3f, 3h, 3k, 3l, 3n, 3p, 3r):

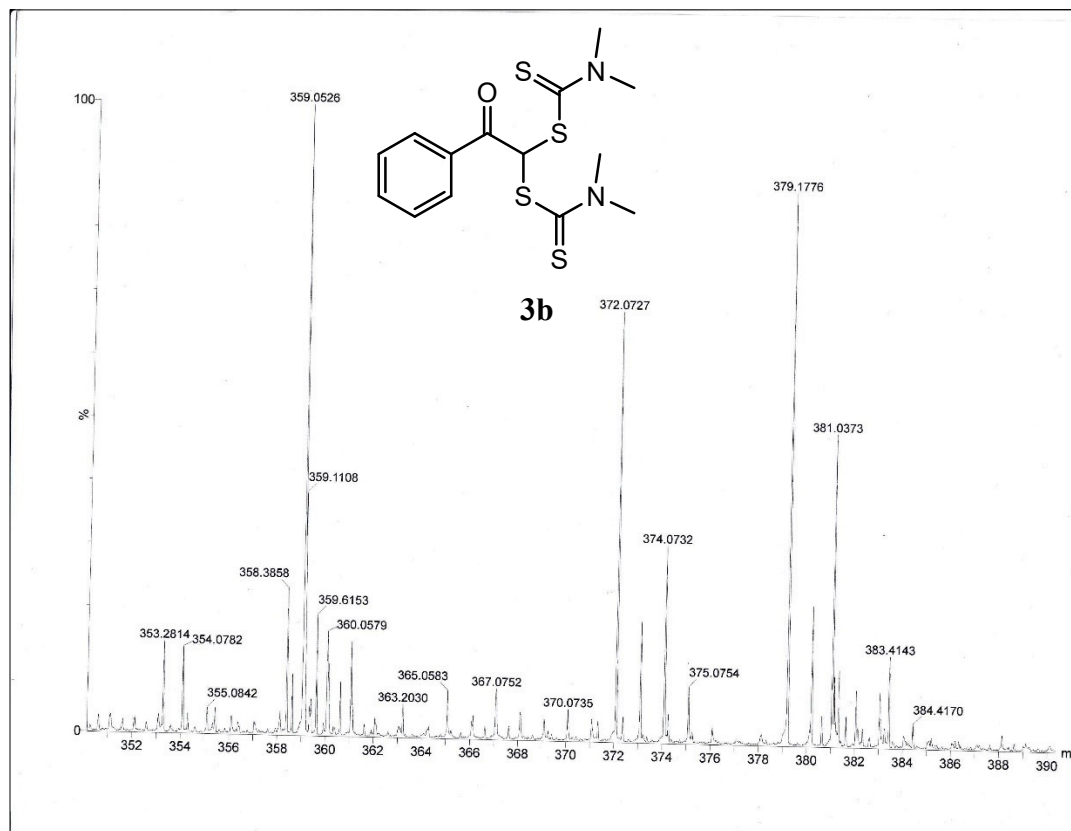

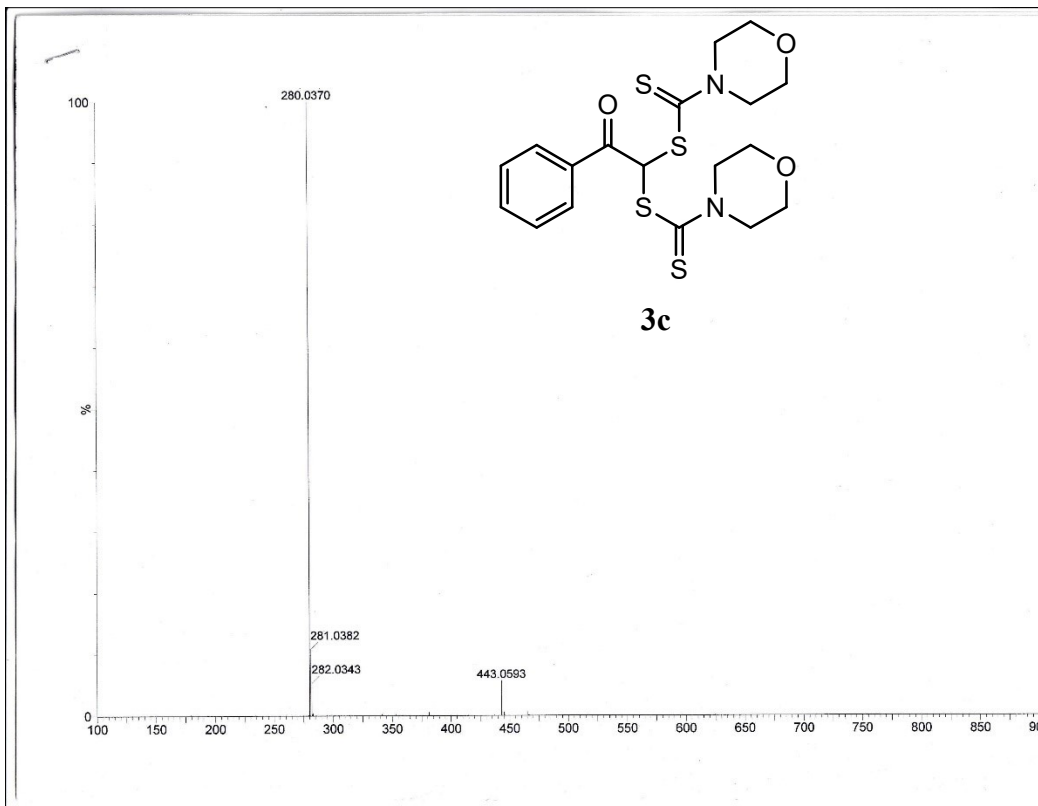



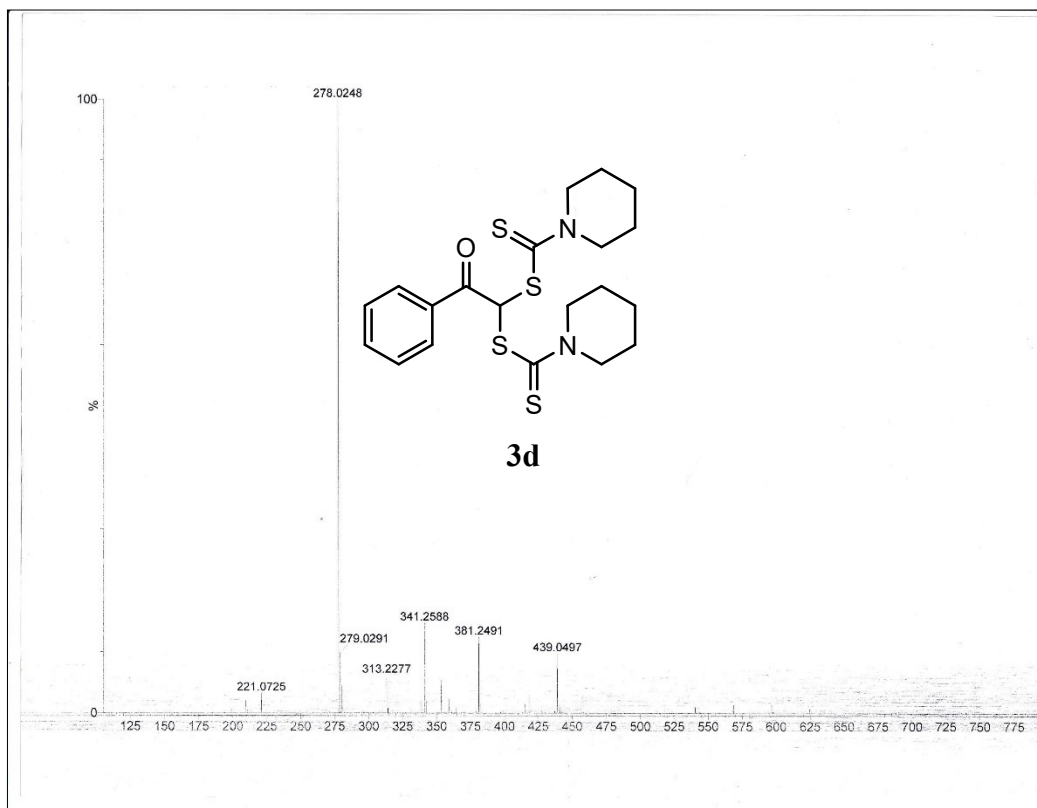

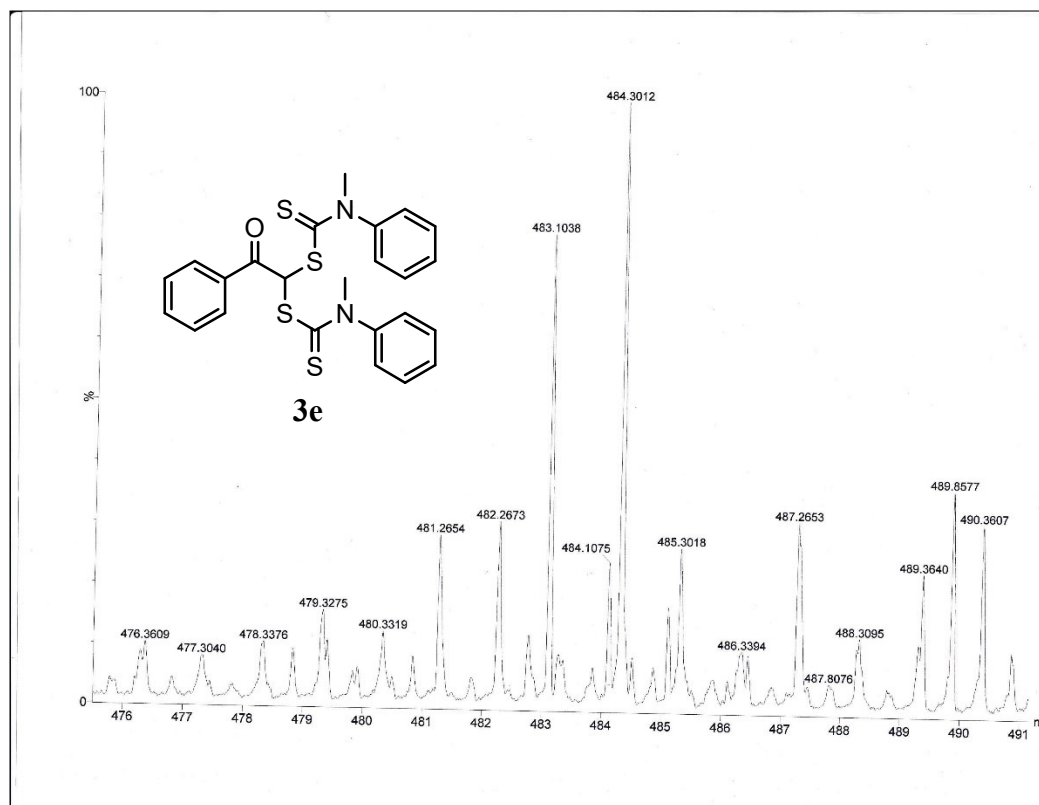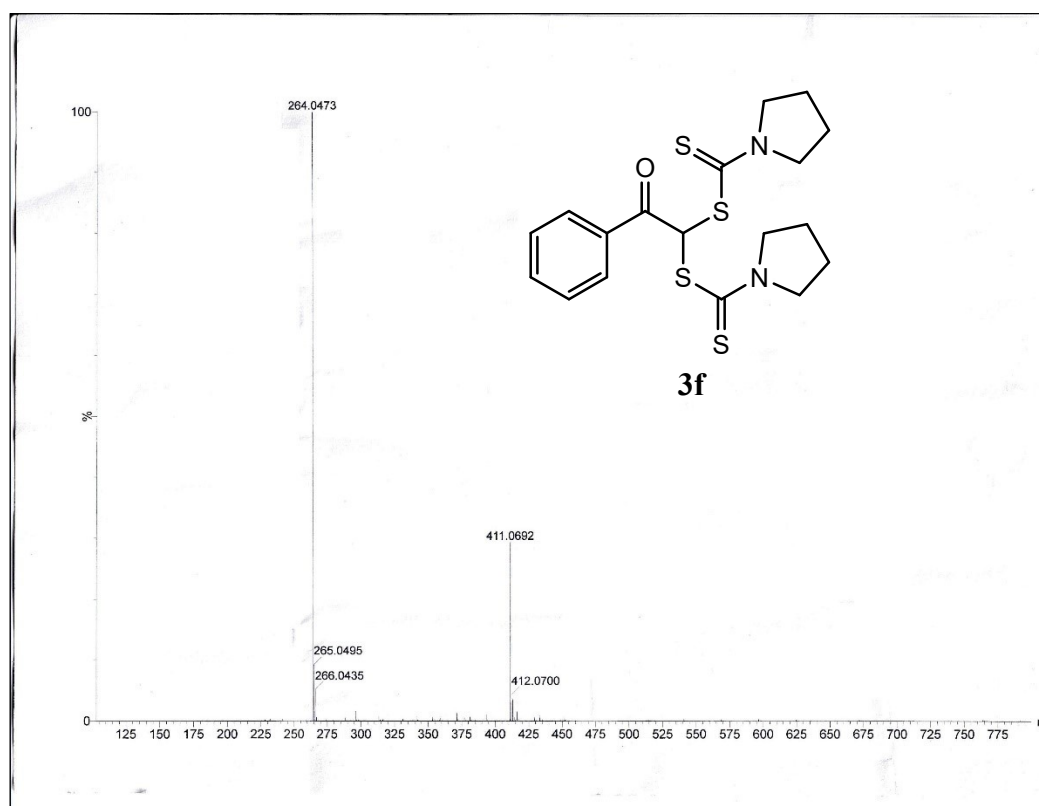

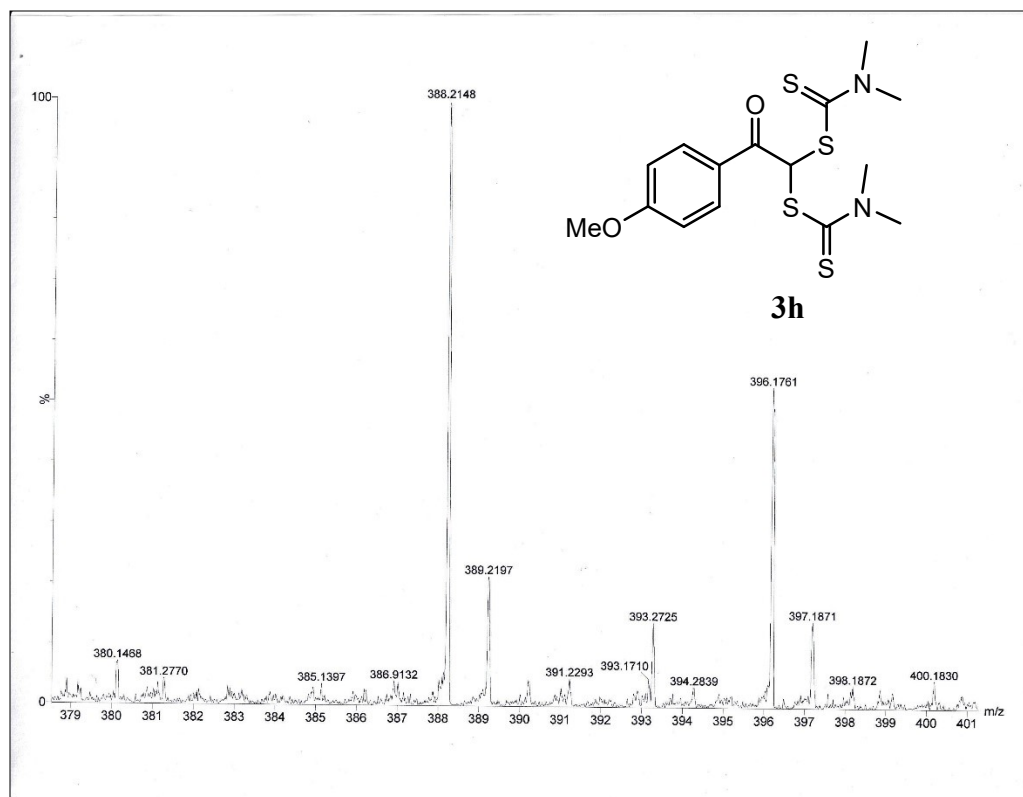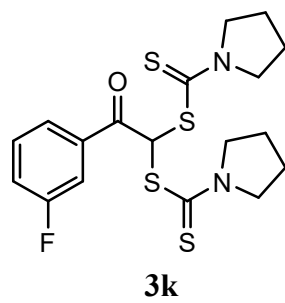

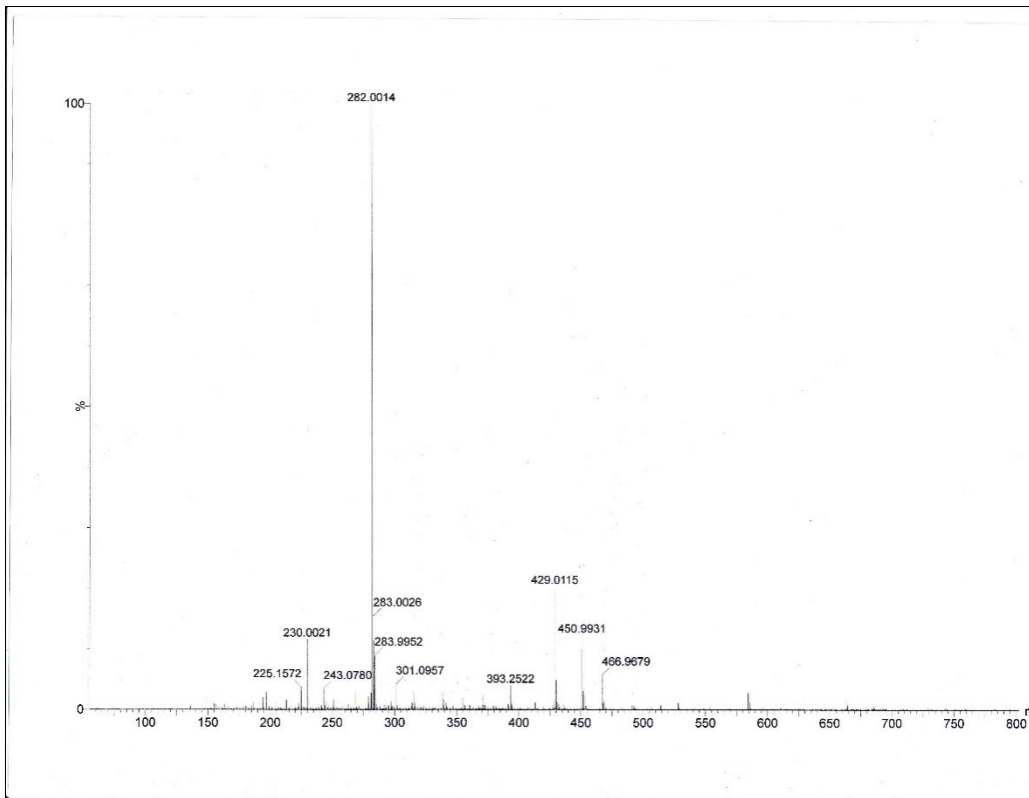

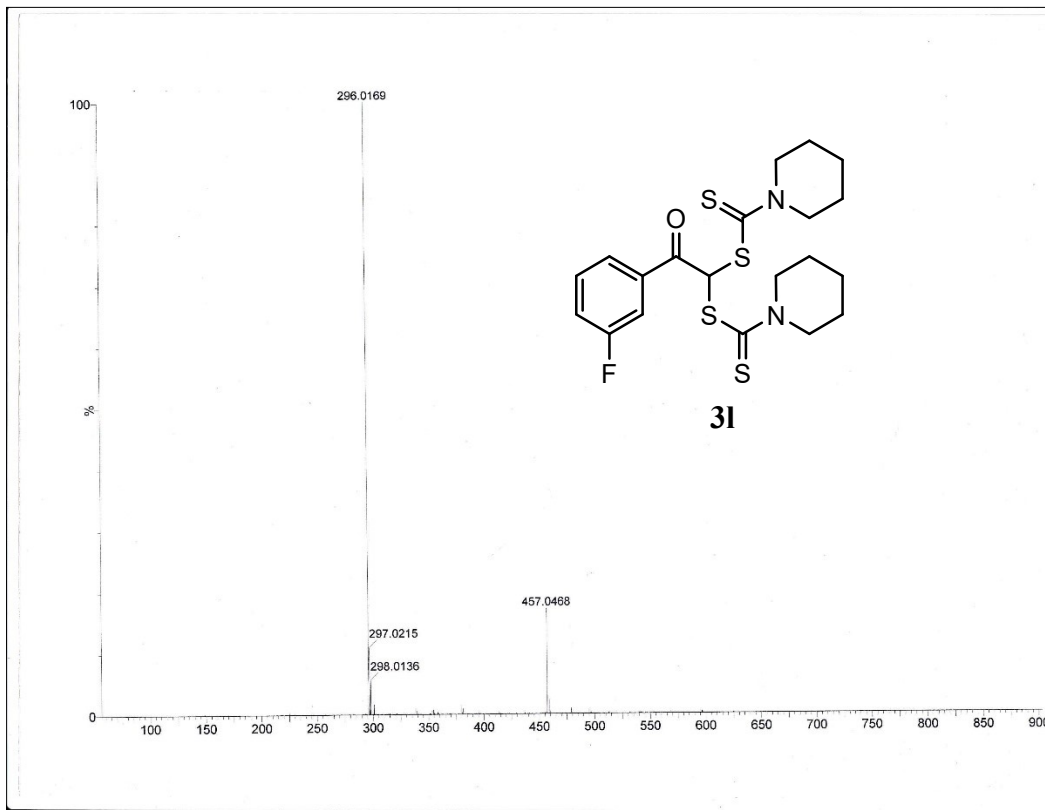

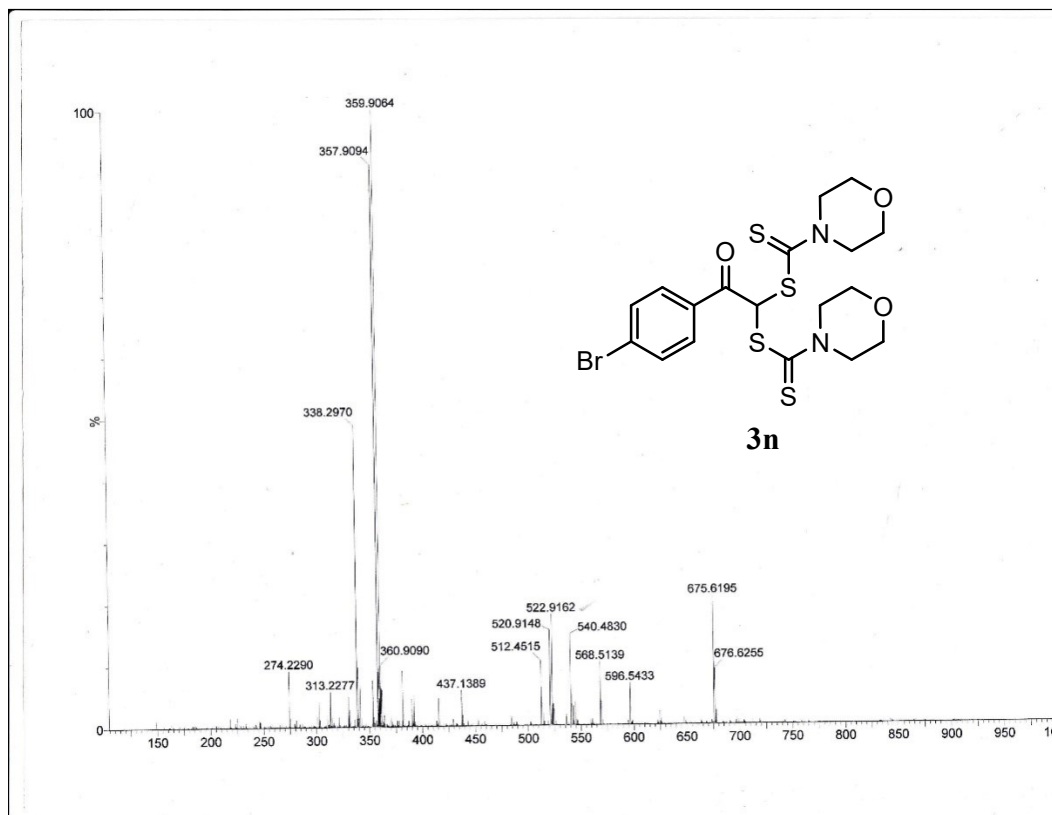

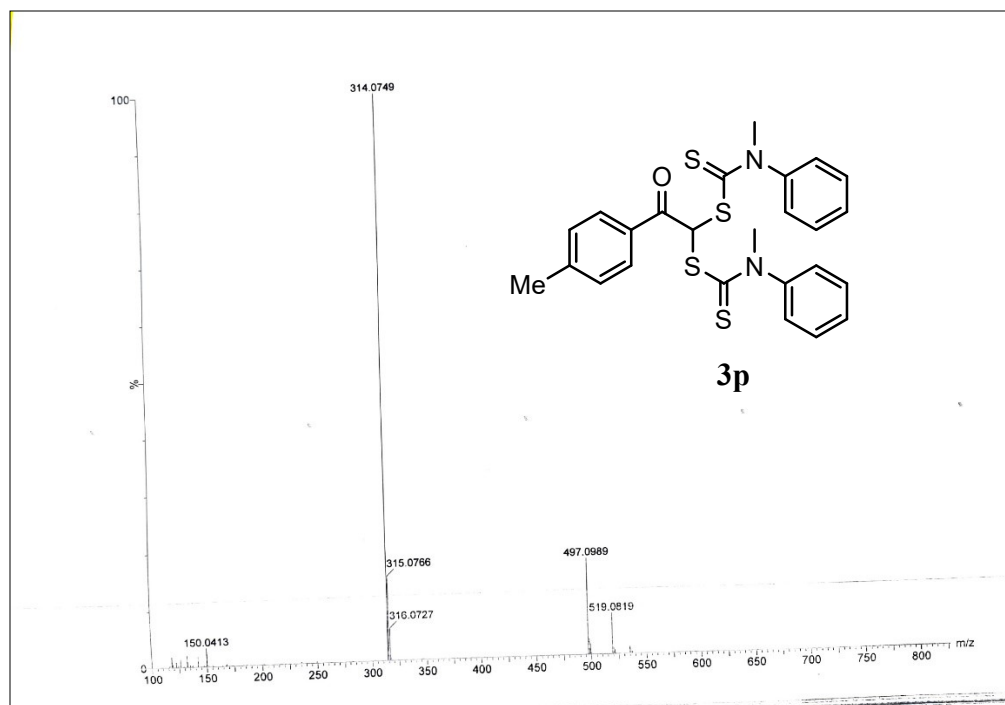

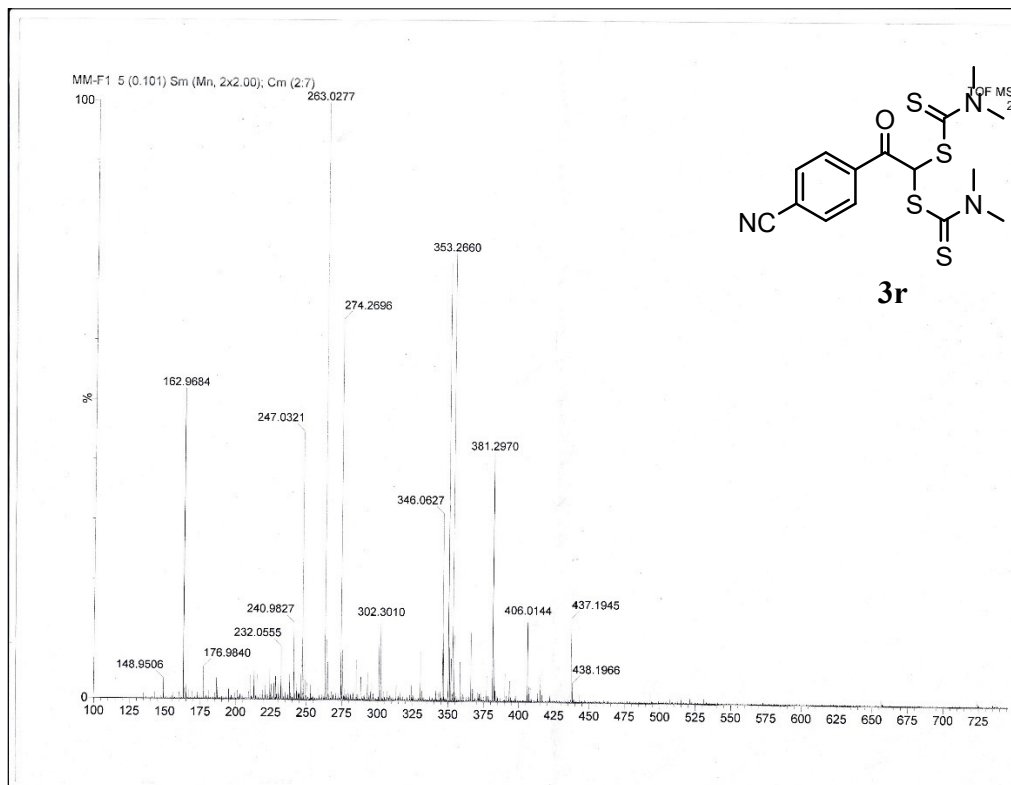

## I. X-ray Crystallography Data:

**Fig. 1.** ORTEP diagram of the crystal structure of **3d** at 50% probability level

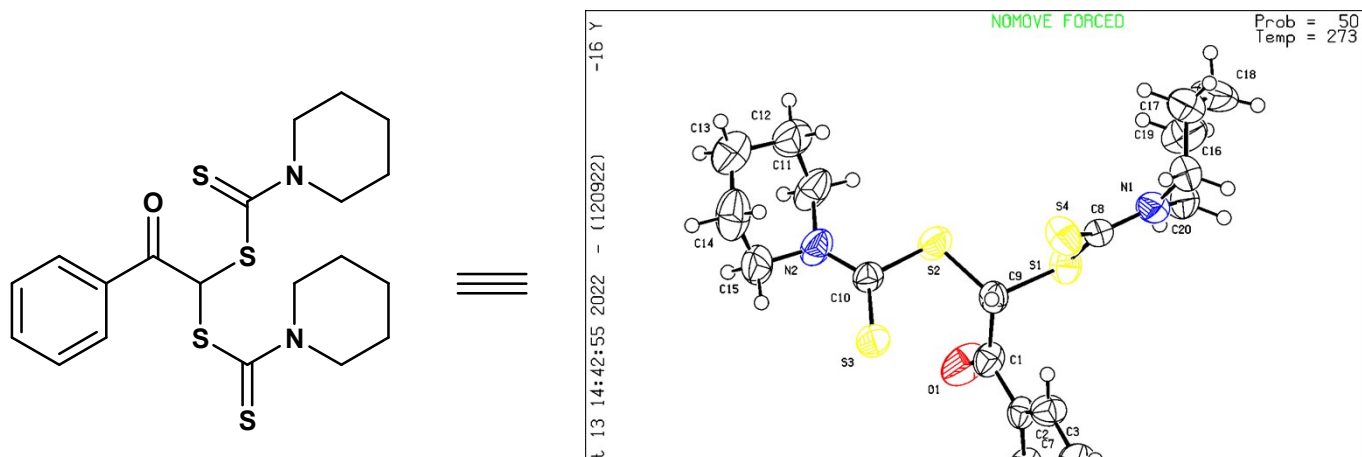



Details of the crystal structure investigation can be obtained from the Cambridge crystallographic data centre, 12 Union Road, Cambridge, CB2 1EZ, UK (3d: CCDC deposition no 2246557)

### **Crystallographic data and structural refinement parameters for 3d**

|                |               |                    |               |
|----------------|---------------|--------------------|---------------|
| Bondprecision: | C-C=0.0154Å   | Wavelength=0.71073 |               |
| Cell:          | a=16.9533(15) | b=7.7548(6)        | c=17.8906(15) |
|                | alpha=90      | beta=110.685(2)    | gamma=90      |
| Temperature:   | 273K          |                    |               |
|                | Calculated    | Reported           |               |
| Volume         | 2200.5(3)     | 2200.4(3)          |               |
| Spacegroup     | P21/n         | P21/n              |               |

|                  |                                                                              |                                                                              |
|------------------|------------------------------------------------------------------------------|------------------------------------------------------------------------------|
| Hallgroup        | -P2yn                                                                        | -P2yn                                                                        |
| Moietyformula    | C <sub>20</sub> H <sub>26</sub> N <sub>2</sub> O <sub>4</sub> S <sub>4</sub> | ?                                                                            |
| Sumformula       | C <sub>20</sub> H <sub>26</sub> N <sub>2</sub> O <sub>4</sub> S <sub>4</sub> | C <sub>20</sub> H <sub>26</sub> N <sub>2</sub> O <sub>4</sub> S <sub>4</sub> |
| Mr               | 438.67                                                                       | 438.67                                                                       |
| Dx,gcm-3         | 1.324                                                                        | 1.324                                                                        |
| Z                | 4                                                                            | 4                                                                            |
| Mu(mm-1)         | 0.445                                                                        | 0.445                                                                        |
| F000             | 928.0                                                                        | 928.0                                                                        |
| F000'            | 930.23                                                                       |                                                                              |
| h,k,lmax         | 22,10,23                                                                     | 22,10,23                                                                     |
| Nref             | 5062                                                                         | 4977                                                                         |
| Tmin, Tmax       |                                                                              |                                                                              |
| Tmin             |                                                                              |                                                                              |
| Correctionmethod | =Notgiven                                                                    |                                                                              |
| Datacompleteness | =0.983                                                                       | Theta(max)=27.532                                                            |
| R(reflections)   | =0.1652(3887)                                                                | WR2 (reflections) =<br>0.2800 (4977)                                         |
| S                | =1.562                                                                       | Npar=248                                                                     |

## J. Gas chromatograms:

GC-MS data were collected from PerkinElmer Clarus SQ 8 C Mass spectrometer. Column specification (COL-Elite-5mS-30).

### Experimental procedure of the preparation of GC-MS sample:

Br<sub>2</sub> (0.05 mL, 1 mmol) in MeCN (1 mL) was added drop-wise to the solution of phenylacetylene (0.1 ml, 1 mmol) in MeCN (2 mL) containing 0.04 mL of water at 5 °C. After complete addition, the reaction mixture was allowed to stir for 15 min at room temperature. Then, two drop of reaction mixture was taken in a vial and diluted with 2 ml acetonitrile solvent. This dilute reaction mixture was used for GC-MS analysis.

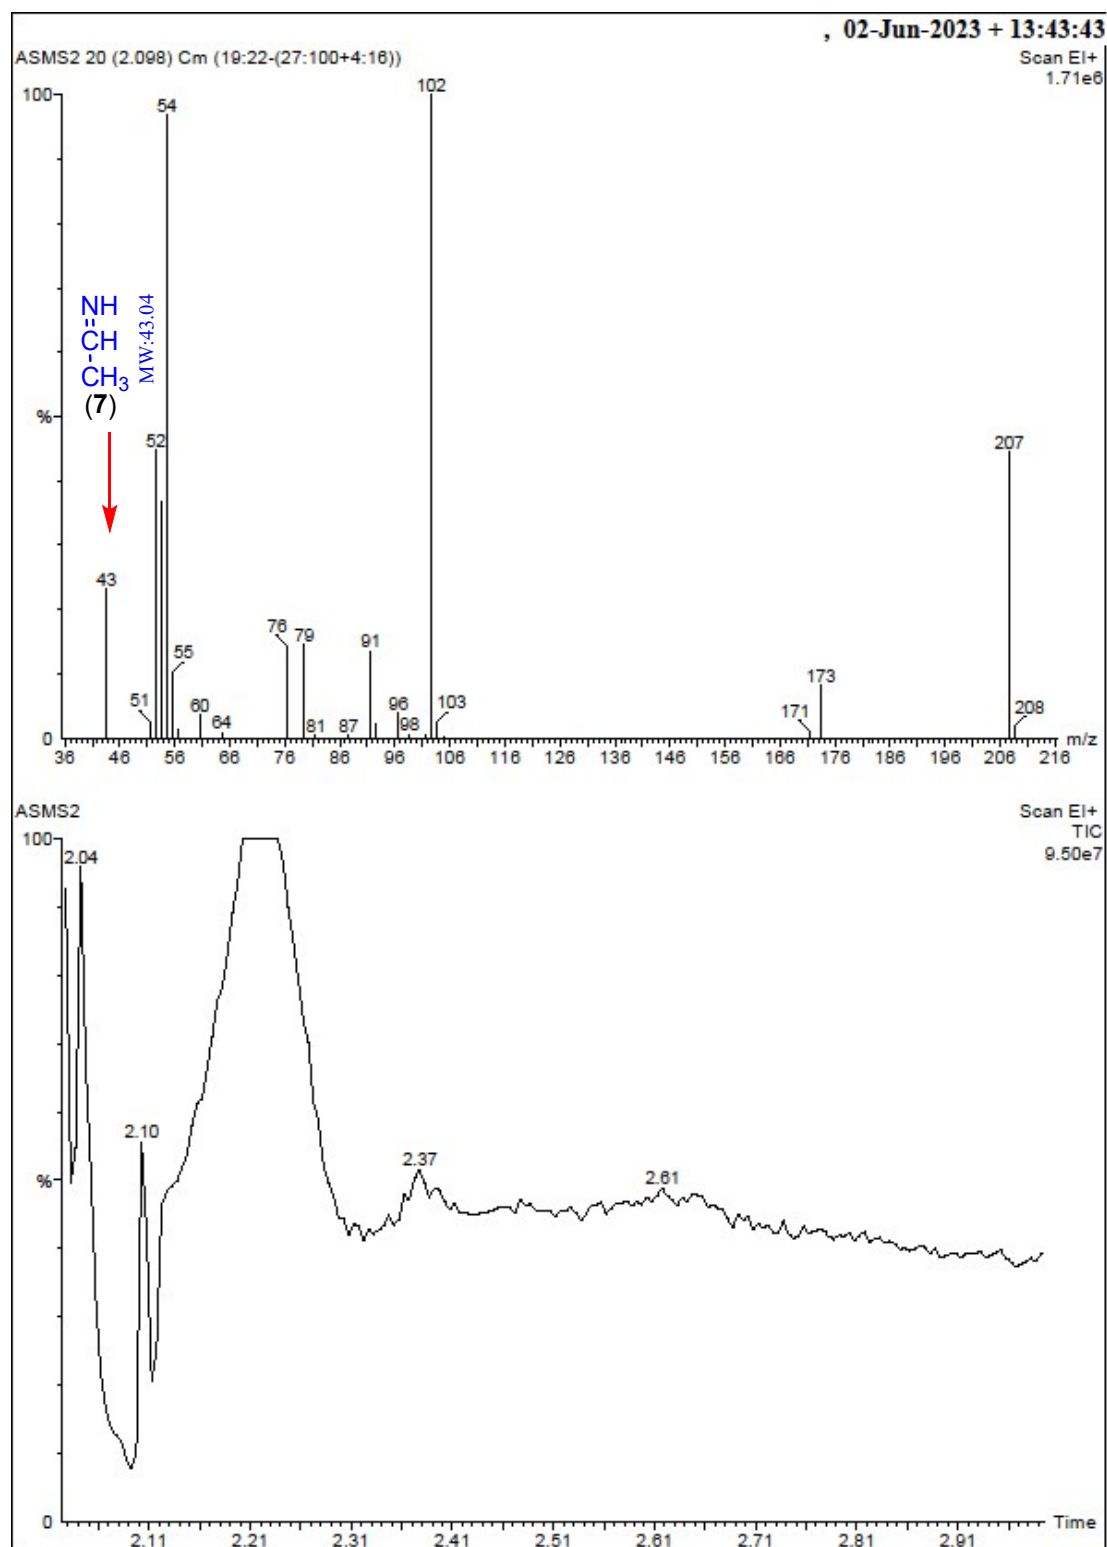

**Fig. 2.** GC spectrum of the reaction mixture described in Scheme 3a.

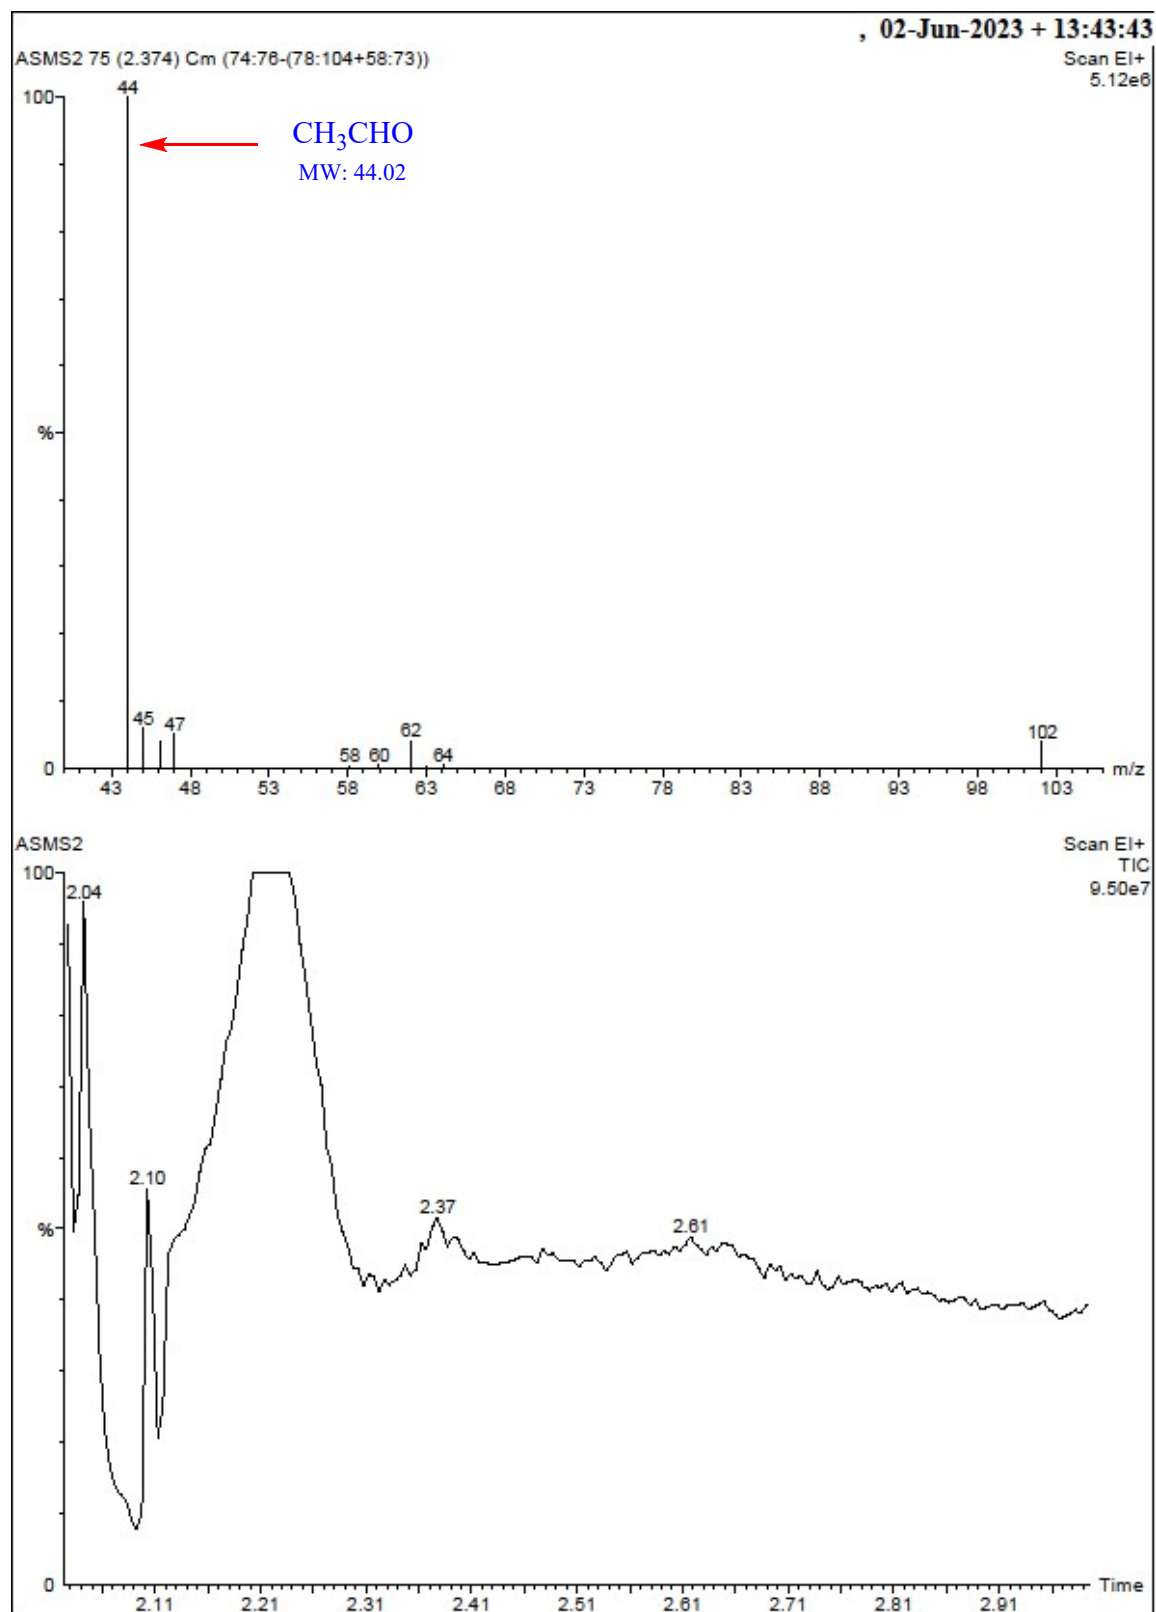

**Fig. 3.** GC spectrum of the reaction mixture described in Scheme 3a.

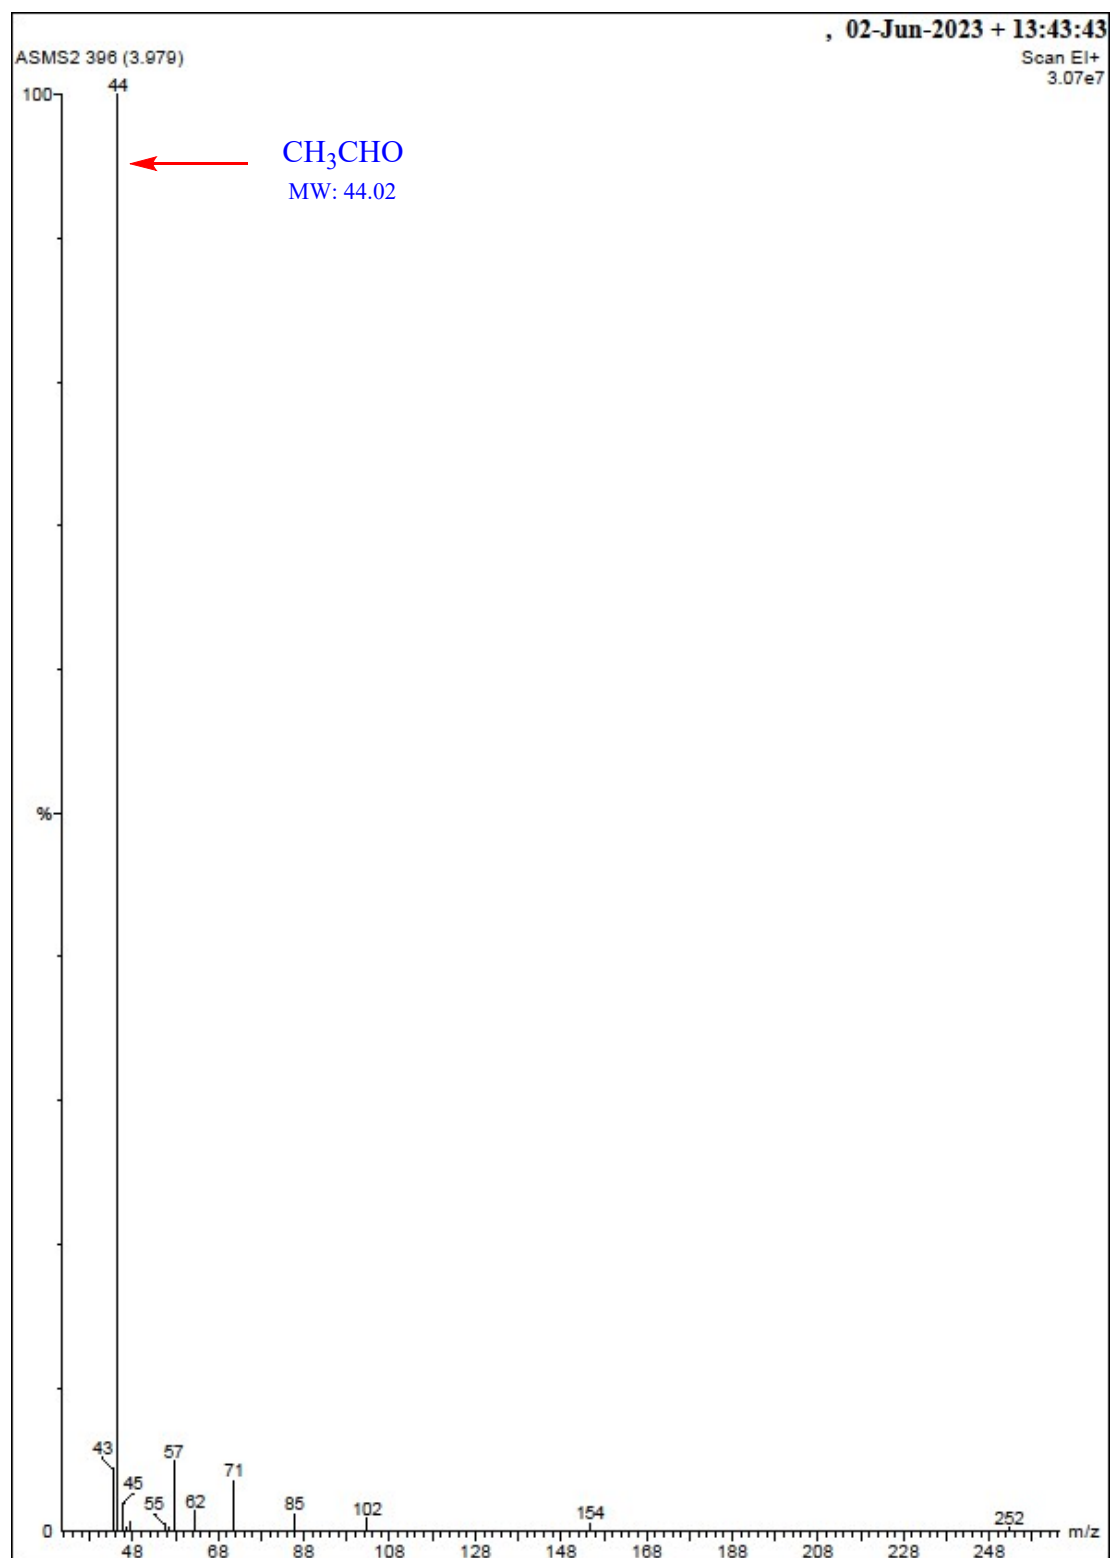

**Fig. 4.** GC spectrum of the reaction mixture described in Scheme 3a.

**K. Reference:**

1. B. Duan, H. Li, Y. Chen, C. Xu, G. Yin, *Tetrahedron Lett.*, 2022, **94**, 153697.
